# Supplementary material for: Magnetic nanomaterials with near-infrared pH-activatable fluorescence via iron-catalyzed AGET ATRP for tumor acidic microenvironment imaging
Source: Royal Society of Chemistry journal article supplement (doi:10.1039/c5tb00070j), 2015-01-01
Supplement: c5tb00070j1.pdf [file c5tb00070j1.pdf]

Supplementary Information

For

**Magnetic nanomaterials with near-infrared pH-activatable fluorescence *via* iron-catalyzed AGET ATRP for tumor acidic microenvironment imaging†**

Xiaodong Liu,<sup>a</sup> Qian Chen<sup>b</sup>, Guangbao Yang<sup>b</sup>, Lifen Zhang,<sup>a</sup> Zhuang Liu,<sup>\*b</sup>  
Zhenping Cheng<sup>\*a</sup> and Xiulin Zhu<sup>a</sup>

<sup>a</sup> *Suzhou key Laboratory of Macromolecular Design and Precision Synthesis, Jiangsu Key Laboratory of Advanced Functional Polymer Design and Application, Department of Polymer Science and Engineering, College of Chemistry, Chemical Engineering and Materials Science, Soochow University, Suzhou 215123, China.*

<sup>b</sup> *Institute of Functional Nano and Soft Materials (FUNSOM) and Jiangsu Key Laboratory for Carbon-Based Functional Materials and Devices, Soochow University, Suzhou 215123, China.*

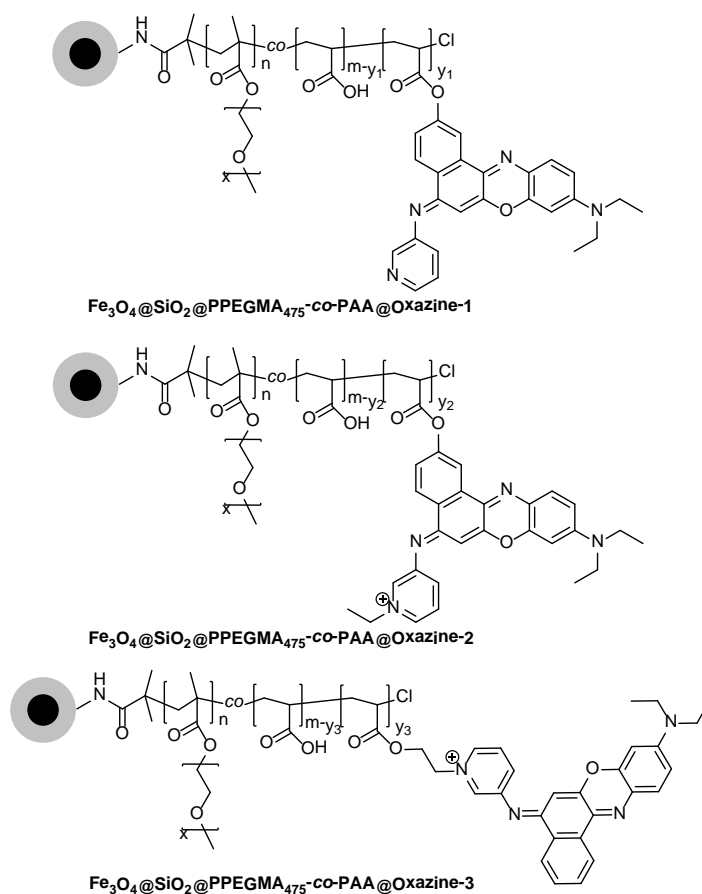

**Fig. S1** Structures of benzo[*a*]phenoxazine-dotted Fe<sub>3</sub>O<sub>4</sub>@SiO<sub>2</sub>@PPEGMA<sub>475</sub>-co-PAA@Oxazine MNPs.

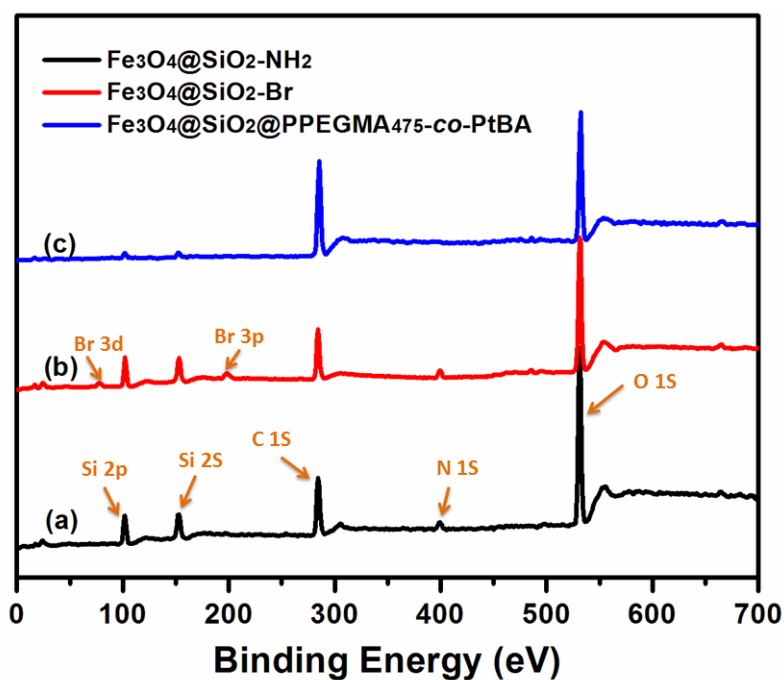

**Fig. S2** XPS spectra of MNPs of (a) Fe<sub>3</sub>O<sub>4</sub>@SiO<sub>2</sub>-NH<sub>2</sub>, (b) Fe<sub>3</sub>O<sub>4</sub>@SiO<sub>2</sub>-Br and (c) Fe<sub>3</sub>O<sub>4</sub>@SiO<sub>2</sub>@PPEGMA<sub>475</sub>-co-PtBA.

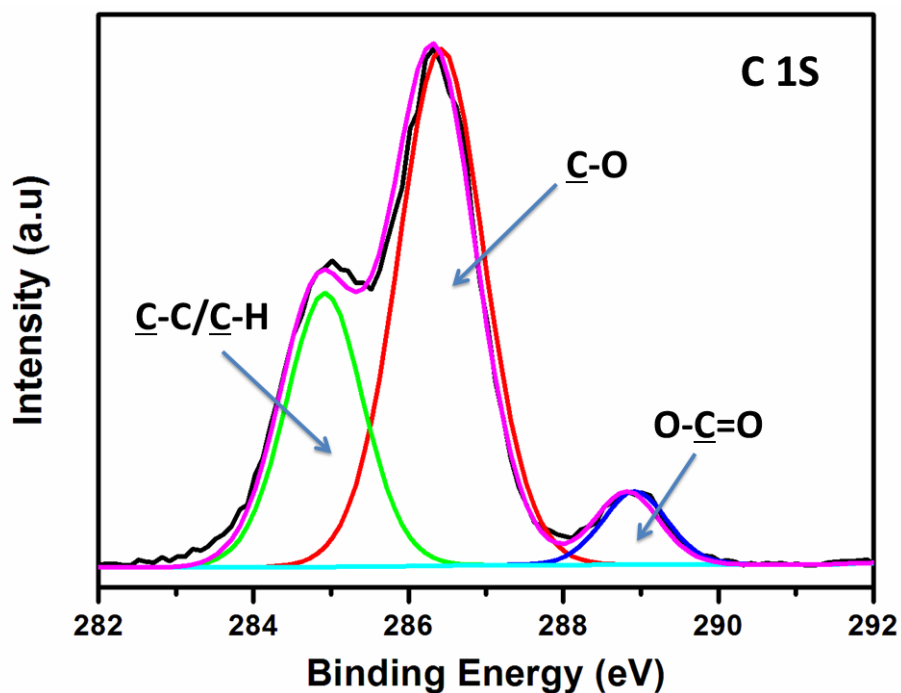

**Fig. S3** XPS C 1s core-level spectra of  $\text{Fe}_3\text{O}_4@\text{SiO}_2@\text{PPEGMA}_{475}\text{-CO-PtBA}$ .

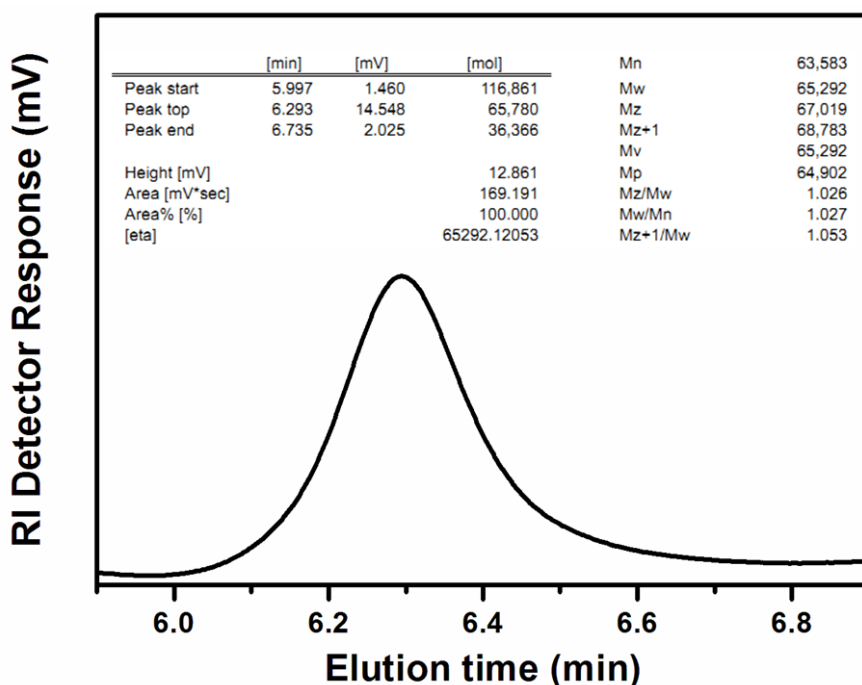

**Fig. S4** GPC curve and data of  $\text{PPEGMA}_{475}\text{-CO-PtBA}$  grafted on the surface of  $\text{Fe}_3\text{O}_4@\text{SiO}_2@\text{PPEGMA}_{475}\text{-CO-PtBA}$ . The sample was obtained by etching with hydrofluoric acid from corresponding MNPs.

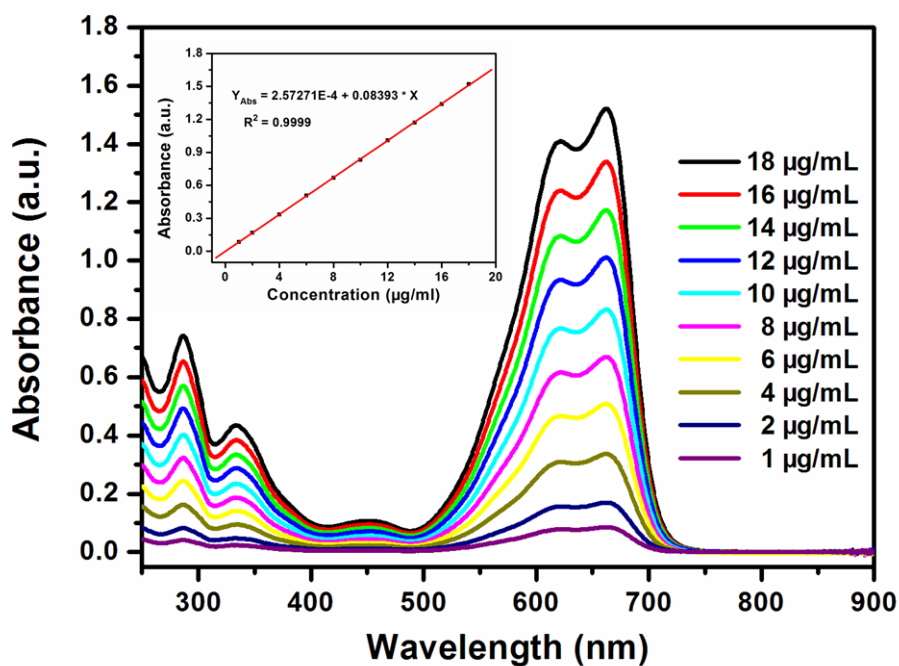

**Fig. S5** Absorption spectra of **3a** (1, 2, 4, 6, 8, 10, 12, 14, 16 and 18 μg/mL) in Na<sub>2</sub>HPO<sub>4</sub>-citric acid buffer solution (pH 3.0); inset shows the linear fit of absorbance at 665 nm.

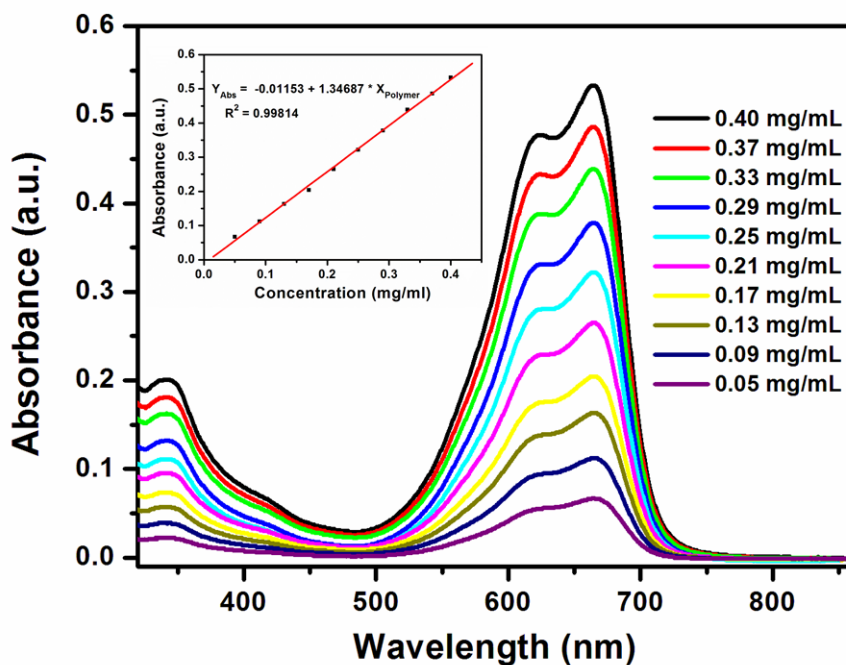

**Fig. S6** Absorption spectra of PPEGMA<sub>475</sub>-co-PAA@Oxazine-2 (0.05, 0.09, 0.13, 0.17, 0.21, 0.25, 0.29, 0.33, 0.37 and 0.40 mg/mL) in Na<sub>2</sub>HPO<sub>4</sub>-citric acid buffer solution (pH 3.0); inset shows the linear fit of absorbance at 665 nm.

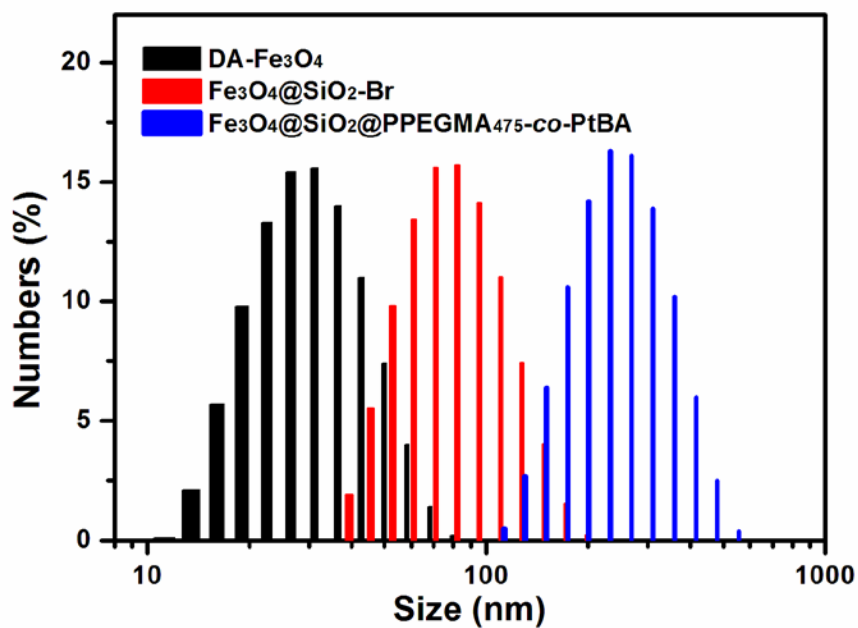

**Fig. S7** Particle sizes of the as-prepared MNPs at different modification stages in water by DLS.

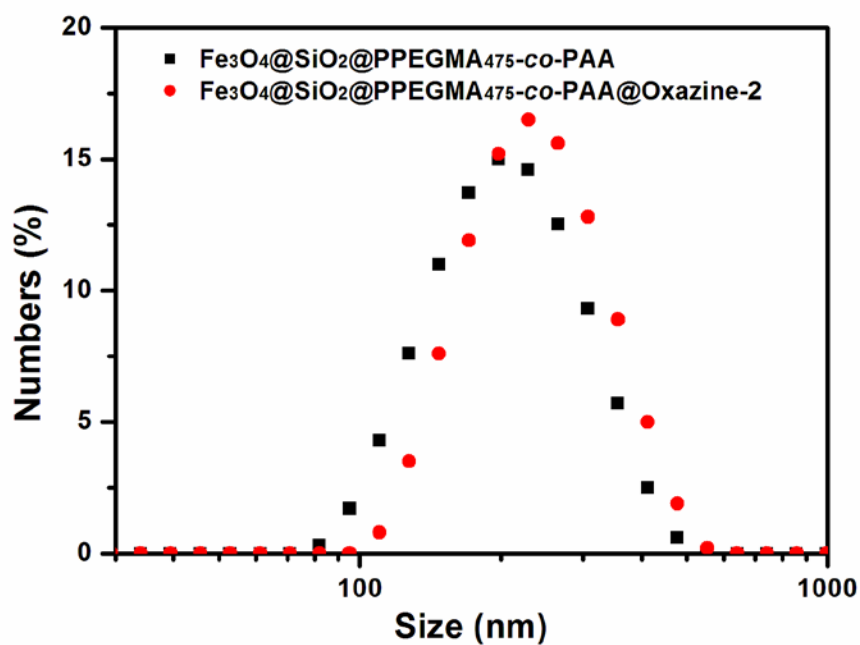

**Fig. S8** Particle sizes of the as-prepared MNPs at different modification stages in water by DLS.

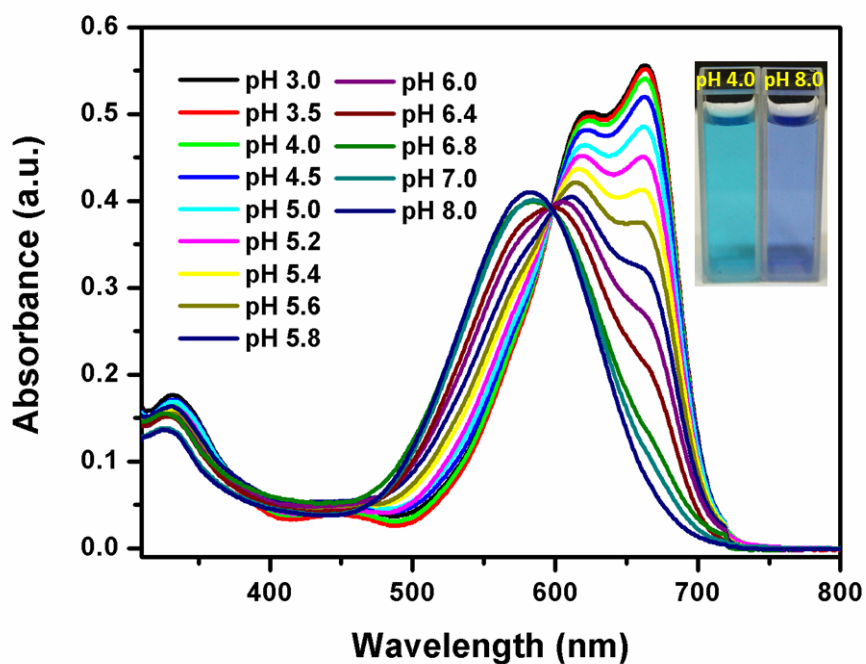

**Fig. S9** Absorption properties of compound **3a** (10  $\mu$ M) toward different pH values in  $\text{Na}_2\text{HPO}_4$ -citric acid buffer solution with 10% DMSO as a co-solvent.

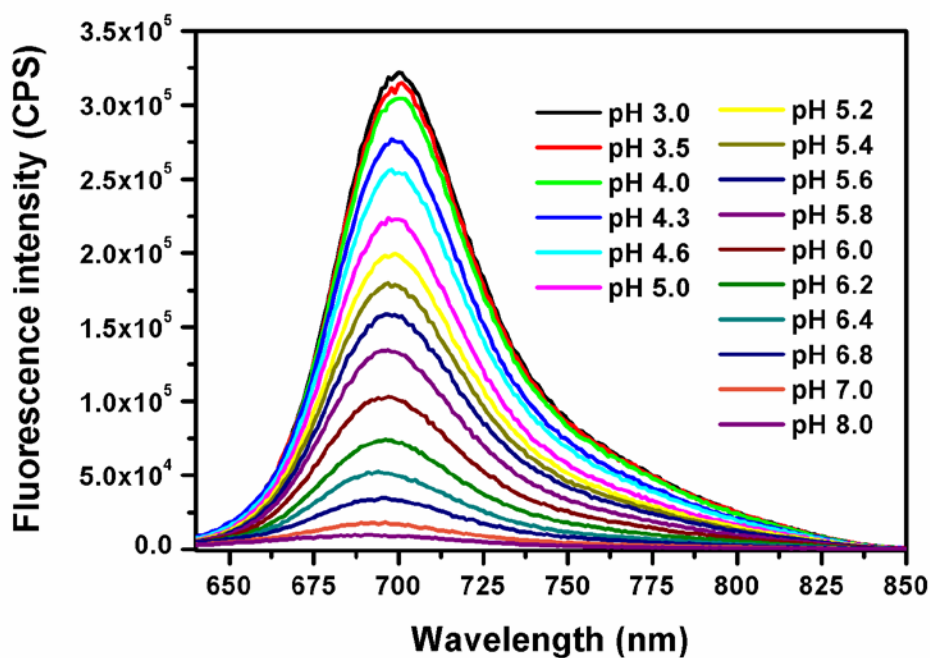

**Fig. S10** Absorption properties of compound **3a** (10  $\mu$ M) toward different pH values in  $\text{Na}_2\text{HPO}_4$ -citric acid buffer solution with 10% DMSO as a co-solvent ( $\lambda_{\text{ex}} = 600$  nm).

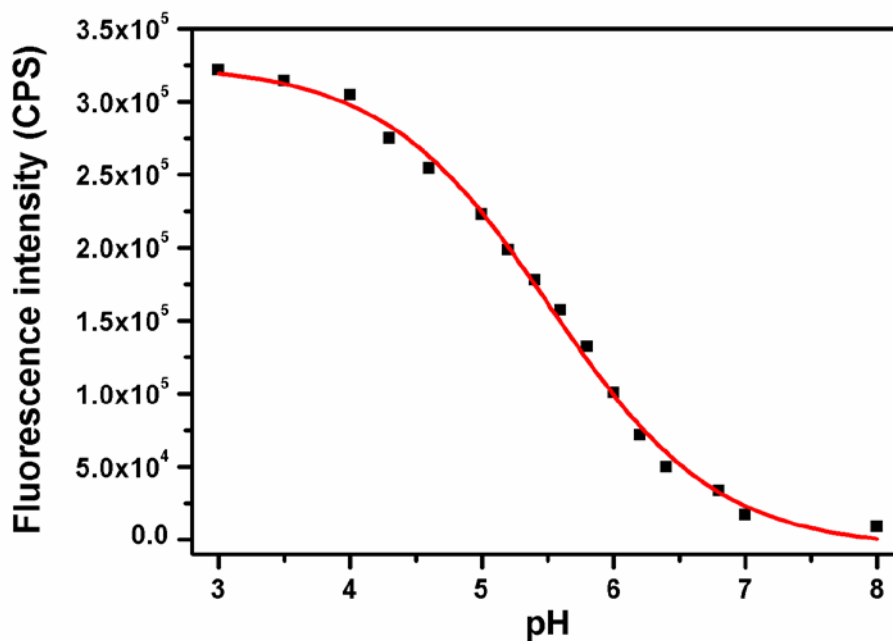

**Fig. S11** Fluorescence intensity changes of compound **3a** (10  $\mu$ M) at 700 nm toward different pH values in  $\text{Na}_2\text{HPO}_4$ -citric acid buffer solution with 10% DMSO as a co-solvent.

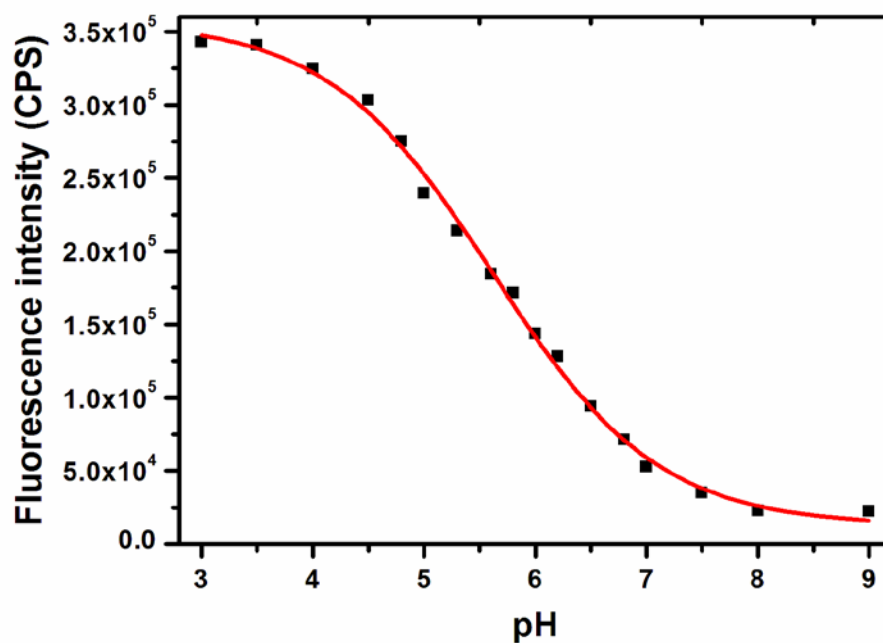

**Fig. S12** Fluorescence intensity changes at 688 nm of  $\text{Fe}_3\text{O}_4@\text{SiO}_2@\text{PPEGMA}_{475}\text{-co-PAA@Oxazine-2}$  toward different pH values in  $\text{Na}_2\text{HPO}_4$ -citric acid buffer solution.

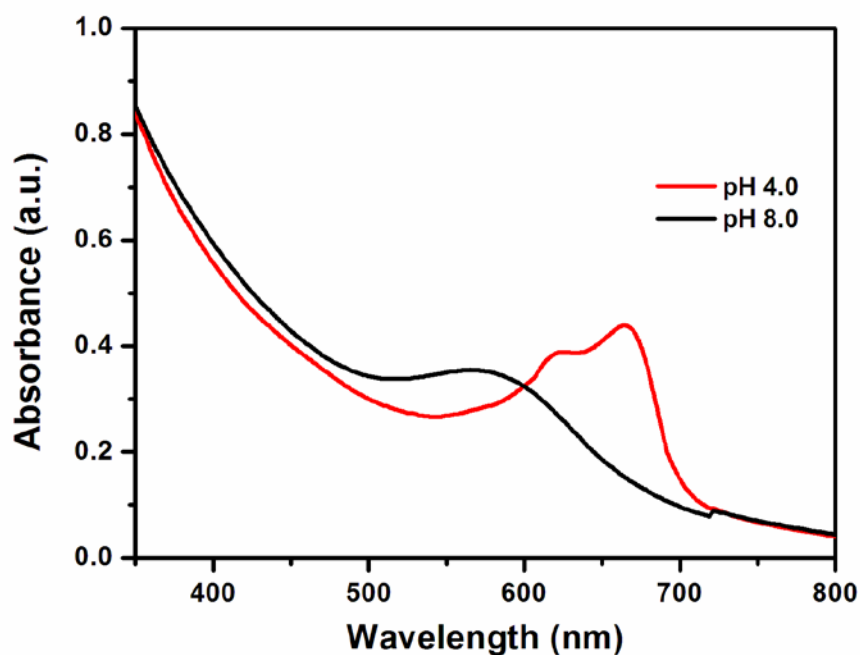

**Fig. S13** Absorption properties of  $\text{Fe}_3\text{O}_4@SiO_2@PPEGMA_{475-co-PAA@Oxazine-2}$  toward different pH values in  $\text{Na}_2\text{HPO}_4$ -citric acid buffer solution. (Iron concentrations is 0.025 mg/mL,  $\lambda_{ex} = 600$  nm).

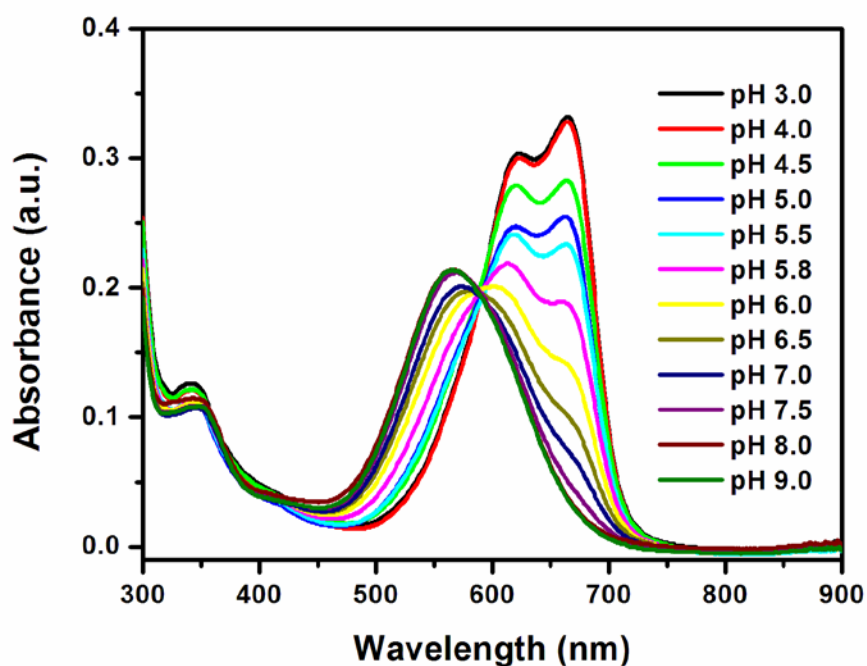

**Fig. S14** Absorption spectra of grafted polymer  $PPEGMA_{475-co-PAA@Oxazine-2}$  (0.25 mg/mL) toward different pH values in  $\text{Na}_2\text{HPO}_4$ -citric acid buffer solution. The polymer was collected from the hybrid  $\text{Fe}_3\text{O}_4@SiO_2@PPEGMA_{475-co-PAA@Oxazine-2}$  MNPs after treated with HF to remove the  $\text{Fe}_3\text{O}_4@SiO_2$  core.



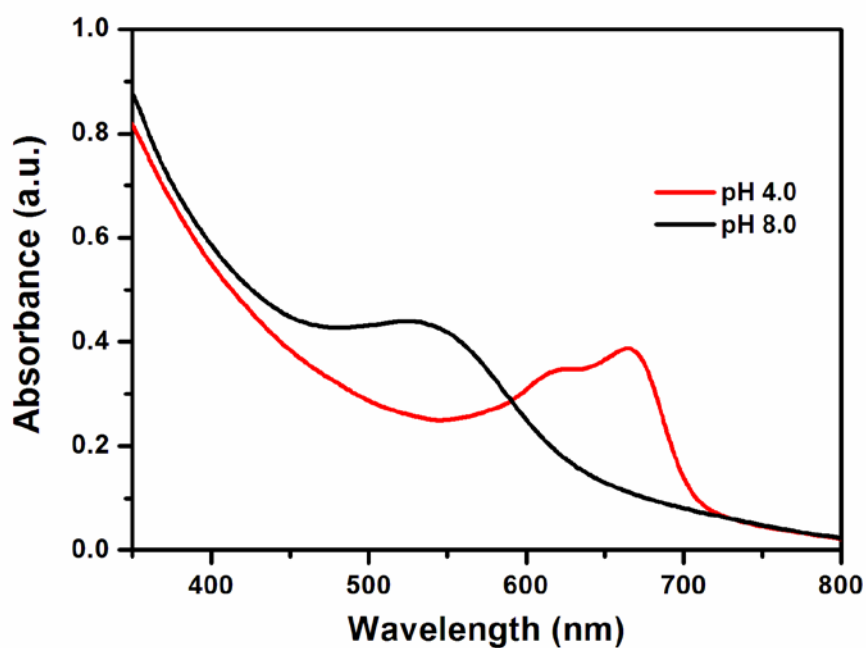

**Fig. S15** Absorption properties of Fe<sub>3</sub>O<sub>4</sub>@SiO<sub>2</sub>@PPEGMA<sub>475-co</sub>-PAA@Oxazine-1 toward different pH values in Na<sub>2</sub>HPO<sub>4</sub>-citric acid buffer solution. (Iron concentrations is 0.025 mg/mL,  $\lambda_{ex}$  = 600 nm).

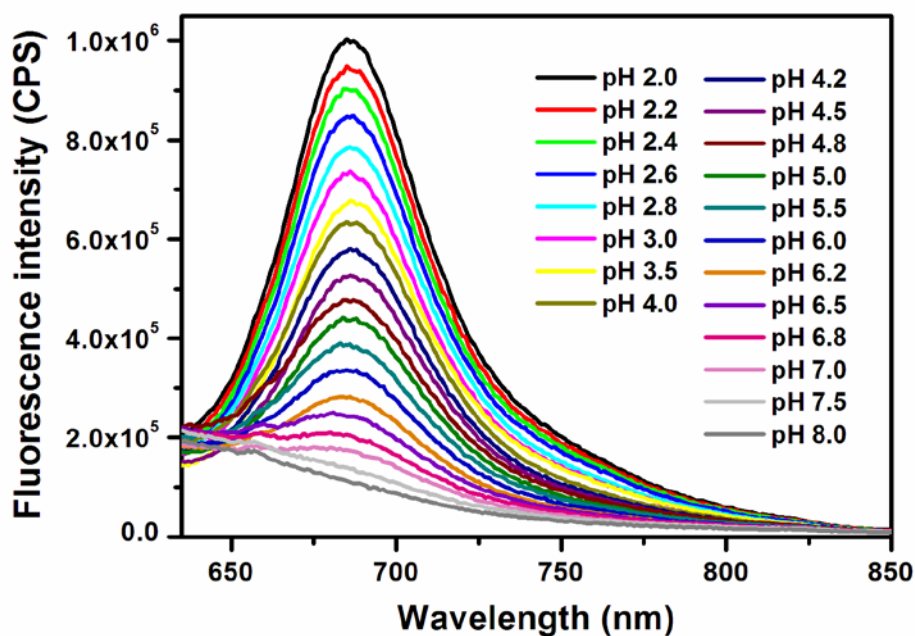

**Fig. S16** Emission properties of Fe<sub>3</sub>O<sub>4</sub>@SiO<sub>2</sub>@PPEGMA<sub>475-co</sub>-PAA@Oxazine-1 toward different pH values in Na<sub>2</sub>HPO<sub>4</sub>-citric acid buffer solution. (Iron concentrations is 0.025 mg/mL,  $\lambda_{ex}$  = 600 nm).

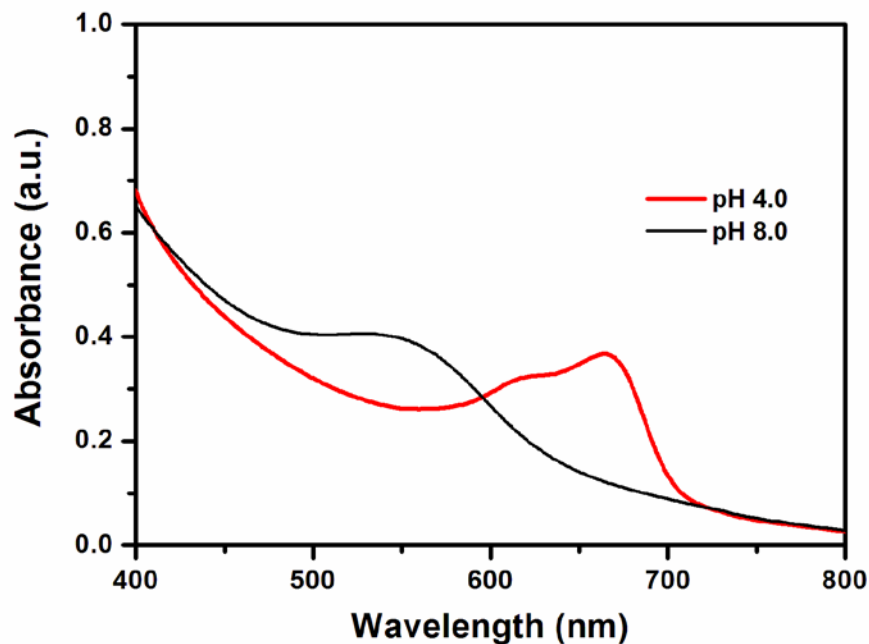

**Fig. S17** Absorption properties of  $\text{Fe}_3\text{O}_4@SiO_2@PPEGMA_{475-co-PAA}@Oxazine-3$  toward different pH values in  $\text{Na}_2\text{HPO}_4$ -citric acid buffer solution. (Iron concentrations is 0.025 mg/mL,  $\lambda_{ex} = 600$  nm).

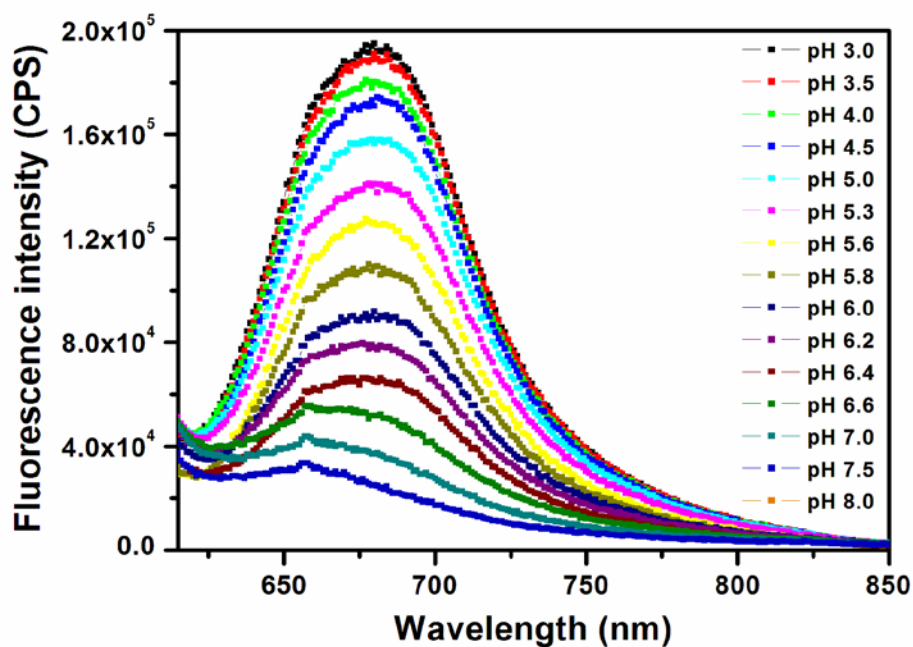

**Fig. S18** Emission properties of  $\text{Fe}_3\text{O}_4@SiO_2@PPEGMA_{475-co-PAA}@Oxazine-3$  toward different pH values in  $\text{Na}_2\text{HPO}_4$ -citric acid buffer solution. (Iron concentrations is 0.012 mg/mL,  $\lambda_{ex} = 600$  nm).

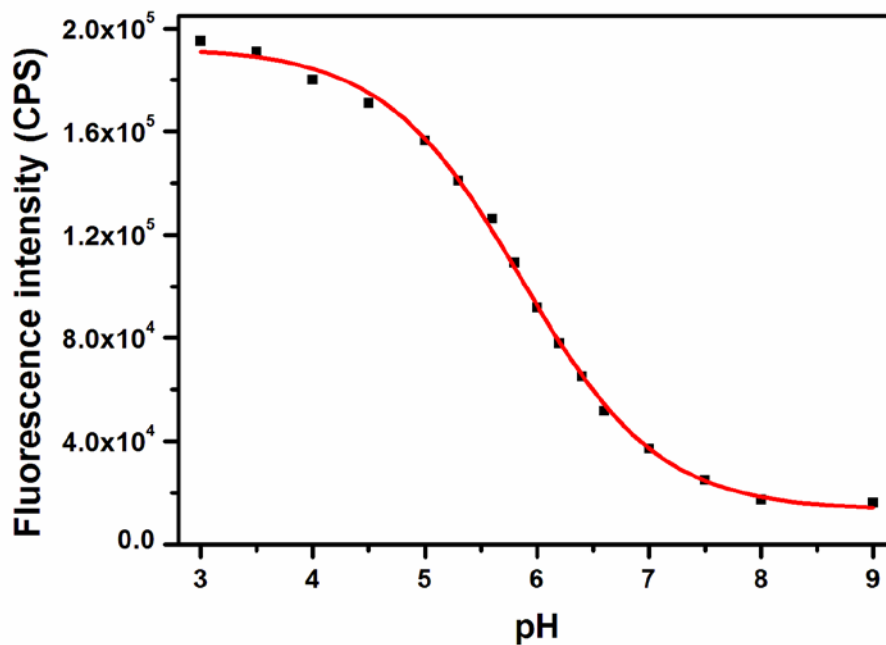

**Fig. S19** Fluorescence intensity changes at 680 nm of  $\text{Fe}_3\text{O}_4@\text{SiO}_2@\text{PPEGMA}_{475}\text{-co-PAA}@\text{Oxazine-3}$  toward different pH values in  $\text{Na}_2\text{HPO}_4$ -citric acid buffer solution.

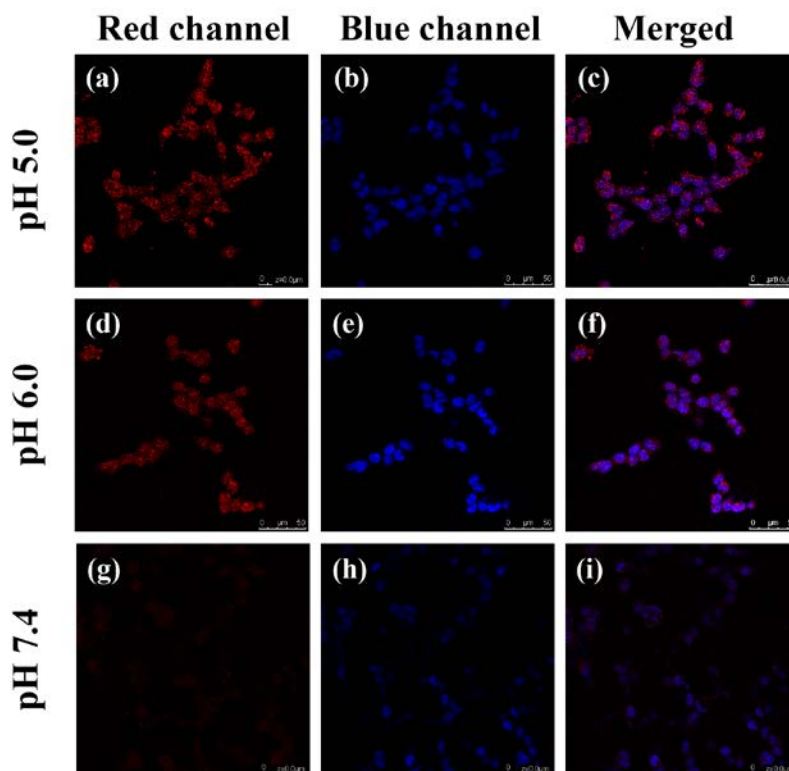

**Fig. S20** Confocal fluorescent images of fixed 293T cells incubated with  $\text{Fe}_3\text{O}_4@\text{SiO}_2@\text{PPEGMA}_{475}\text{-co-PAA}@\text{Oxazine-2}$  and Hoechst 33342 at pH 5.0 (a-c), pH 6.0 (d-f), and pH 7.4 (g-i), respectively.

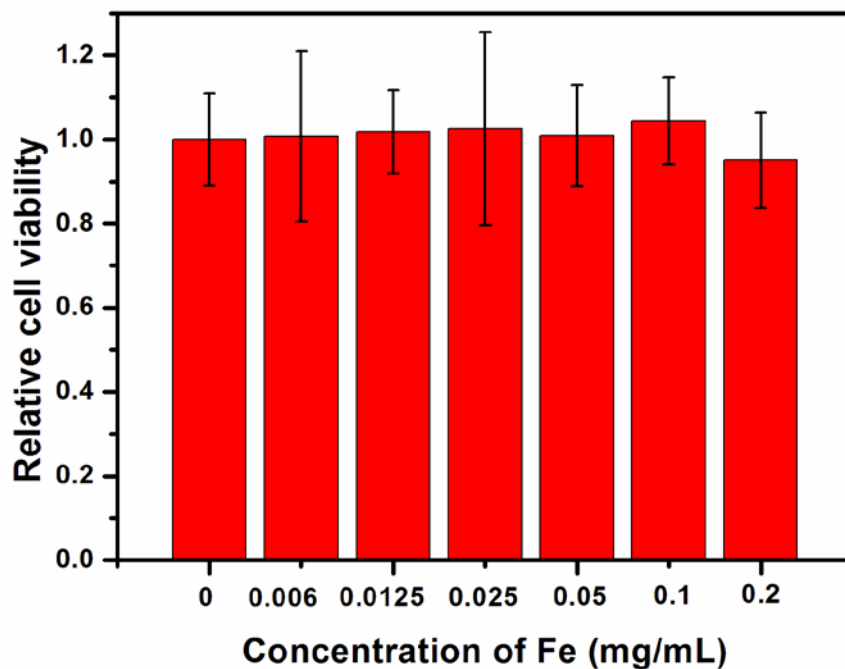

**Fig. S21** Relative cell viability data of 4T1 cells incubated with a series of iron concentrations of  $\text{Fe}_3\text{O}_4@\text{SiO}_2@\text{PPEGMA}_{475}\text{-CO-PAA}@ \text{Oxazine-2}$  measured by the MTT cell viability assay.

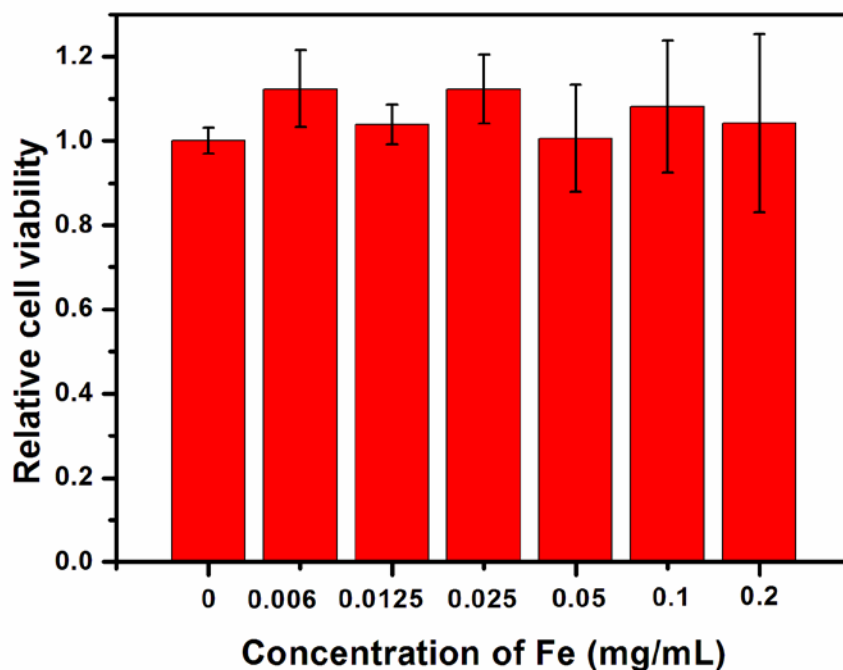

**Fig. S22** Relative cell viability data of 293T cells incubated with a series of iron concentrations of  $\text{Fe}_3\text{O}_4@\text{SiO}_2@\text{PPEGMA}_{475}\text{-CO-PAA}@ \text{Oxazine-2}$  measured by the MTT cell viability assay.

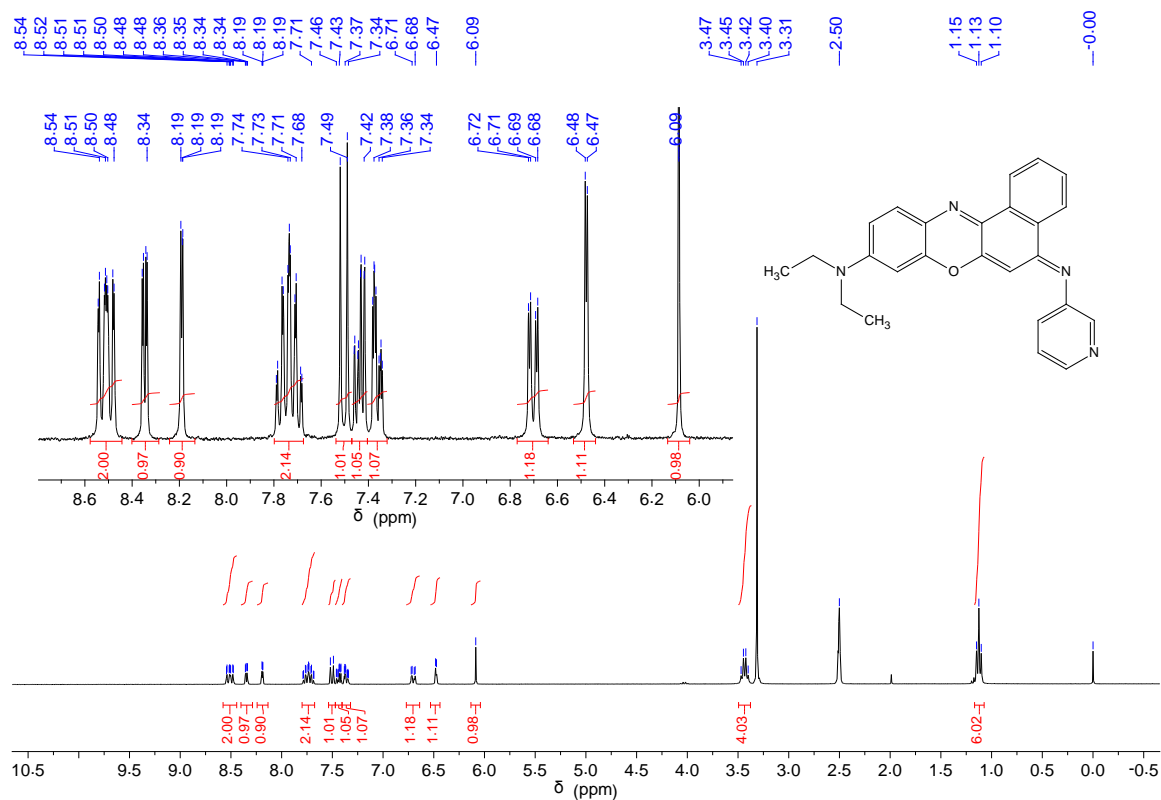

**Fig. S23** <sup>1</sup>H NMR (300 MHz) of **2a** in DMSO-*d*<sub>6</sub>.

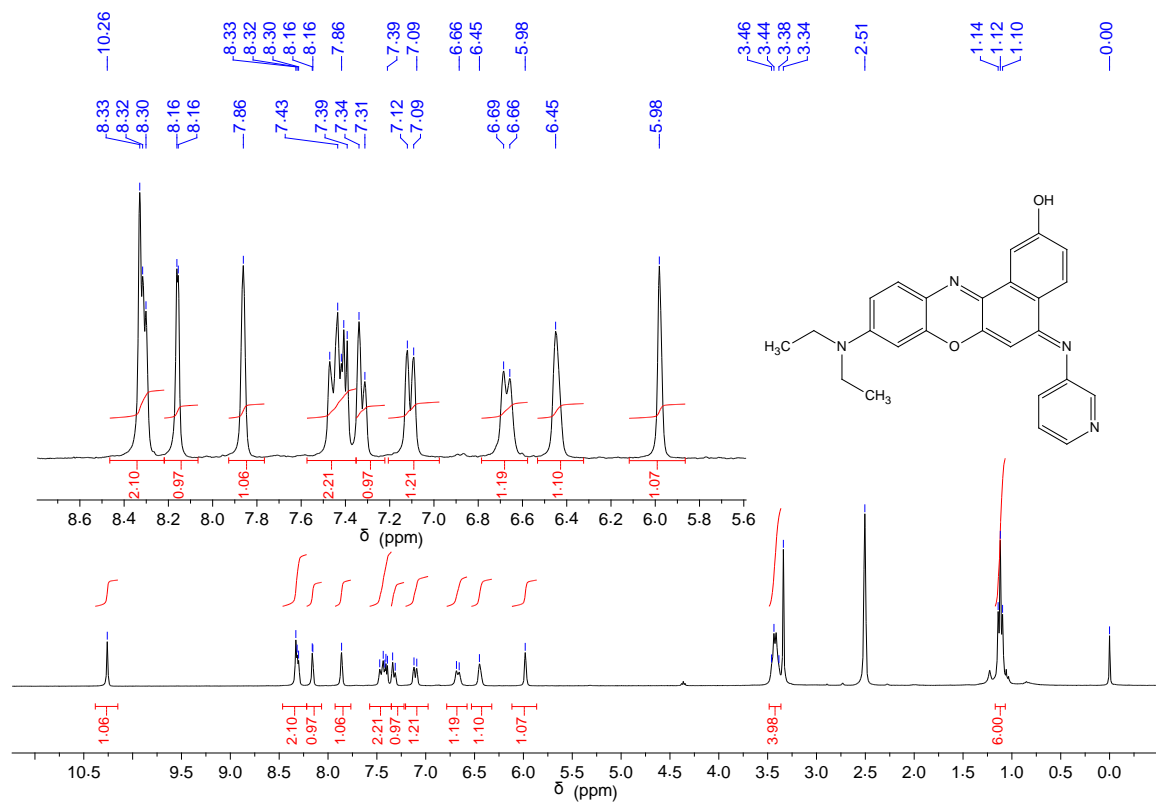

**Fig. S24** <sup>1</sup>H NMR (300 MHz) of **2b** in DMSO-*d*<sub>6</sub>.

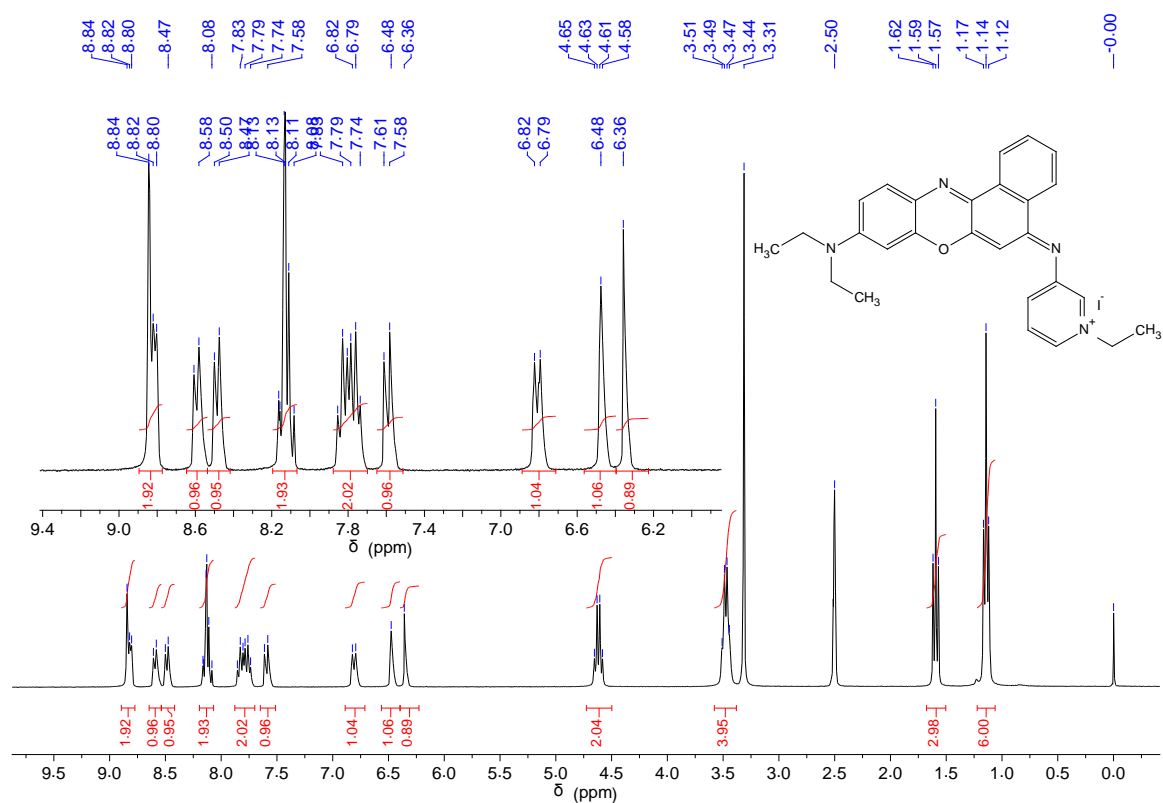

Fig. S25 <sup>1</sup>H NMR spectra (300 MHz) of **3a** in DMSO-*d*<sub>6</sub>.

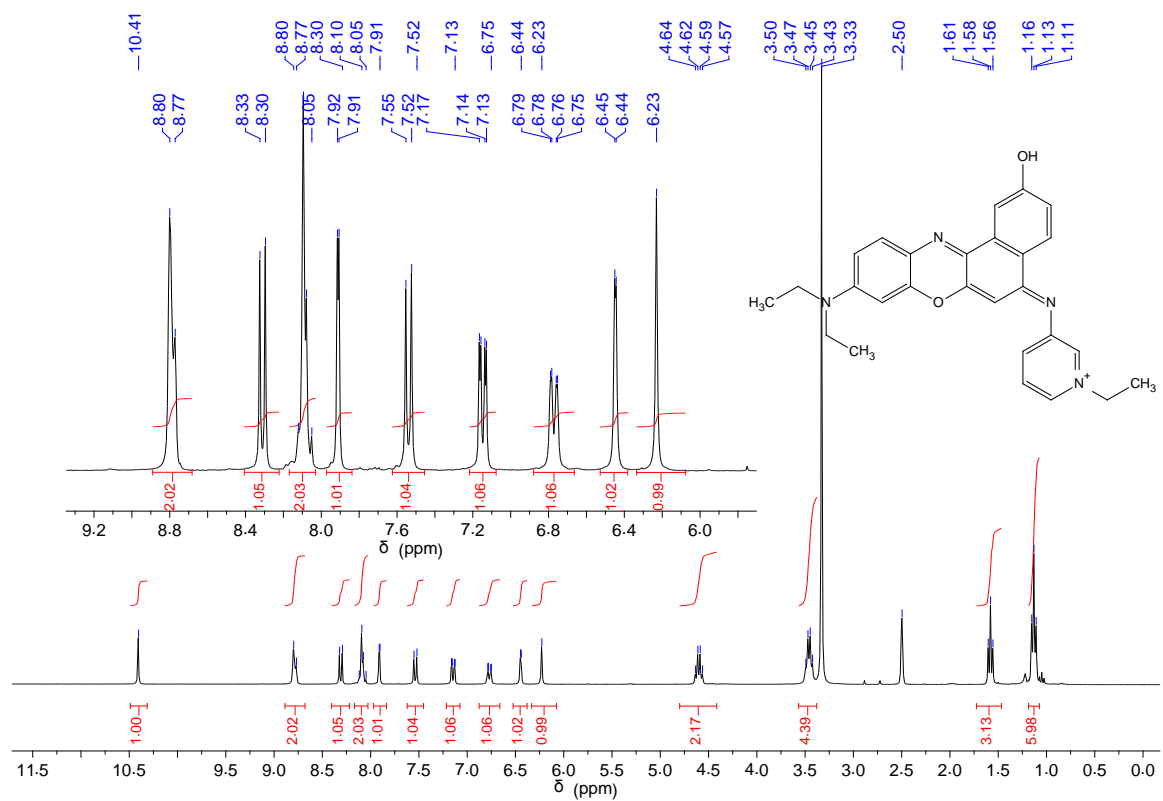

Fig. S26 <sup>1</sup>H NMR spectra (300 MHz) of **3b** in DMSO-*d*<sub>6</sub>.

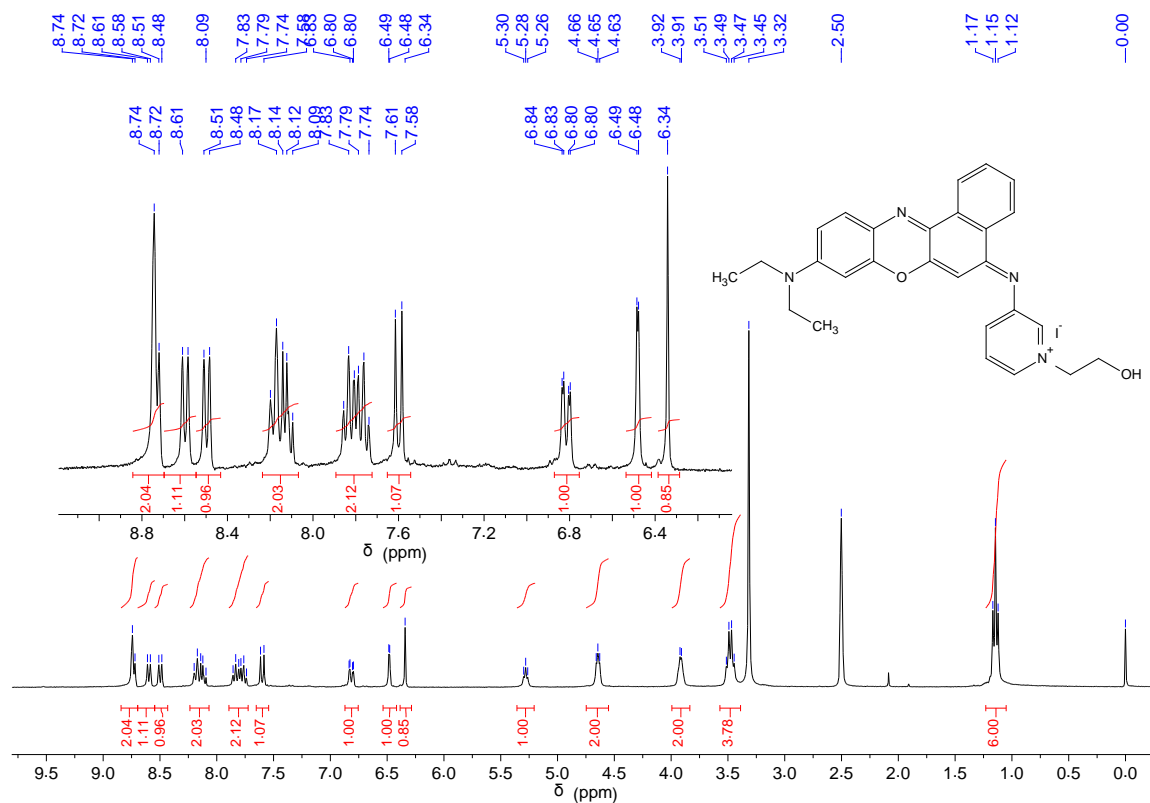

**Fig. S27** <sup>1</sup>H NMR (300 MHz) of **3c** in DMSO-*d*<sub>6</sub>.

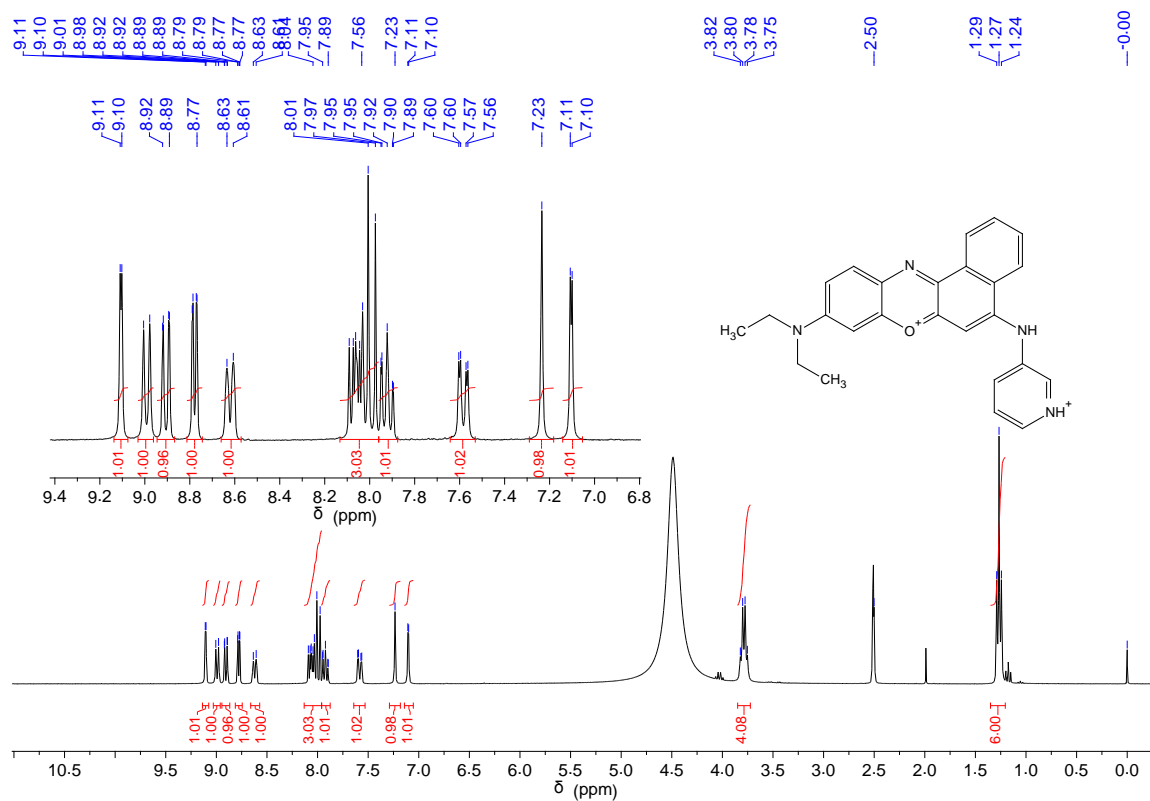

**Fig. S28** <sup>1</sup>H NMR spectra (300 MHz) of **2a+H<sup>+</sup>** in DMSO-*d*<sub>6</sub>.

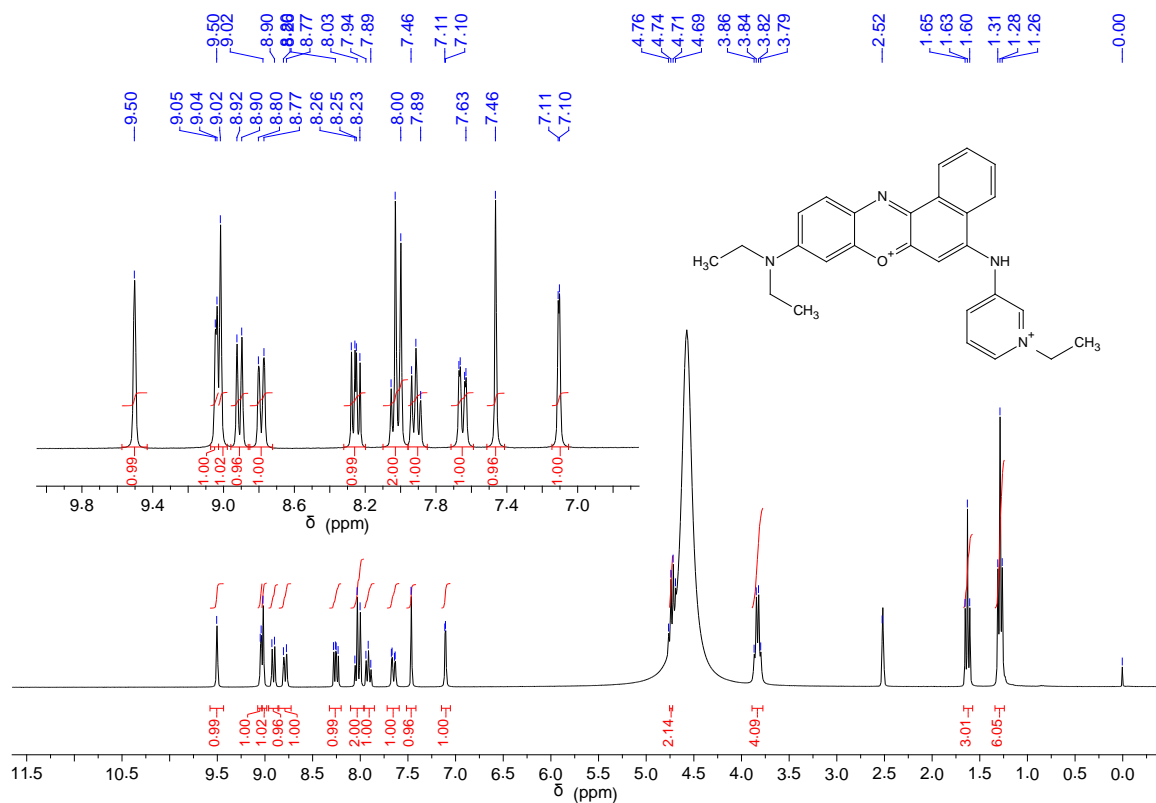

**Fig. S29** <sup>1</sup>H NMR spectra (300 MHz) of **3a+H<sup>+</sup>** in DMSO-*d*<sub>6</sub>.

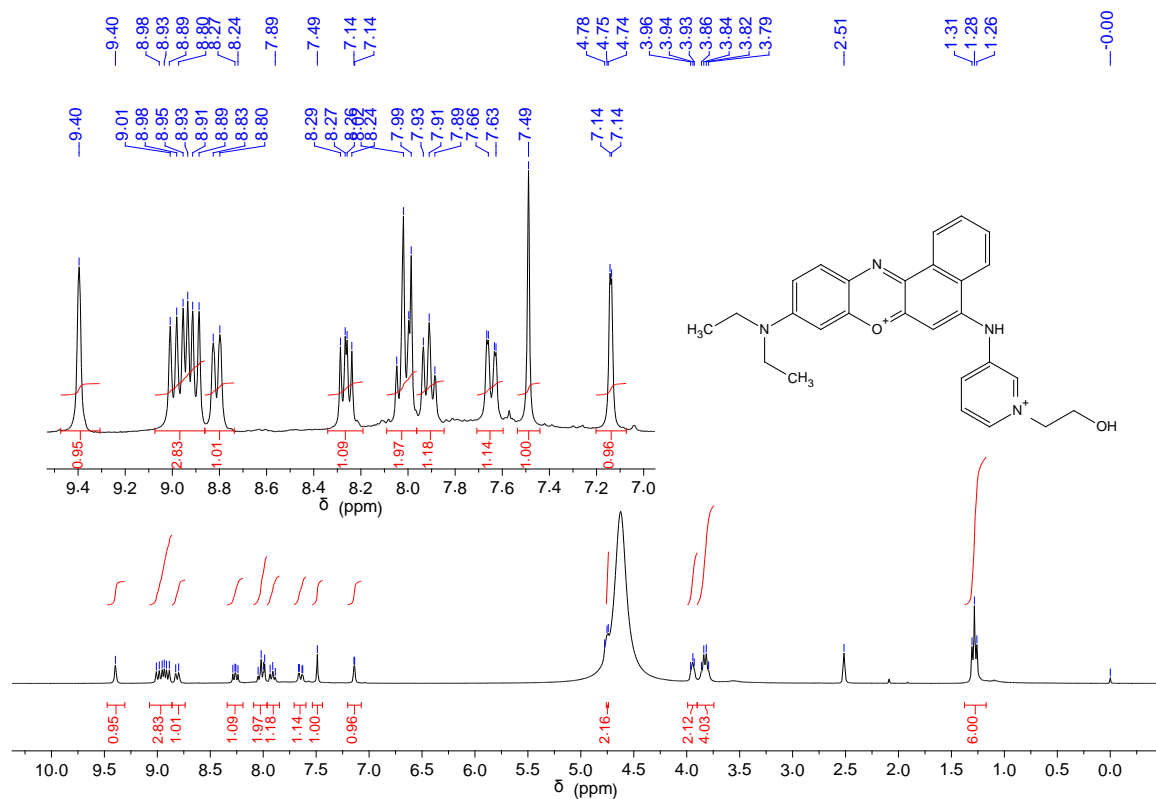

**Fig. S30** <sup>1</sup>H NMR spectra (300 MHz) of **3c+H<sup>+</sup>** in DMSO-*d*<sub>6</sub>.



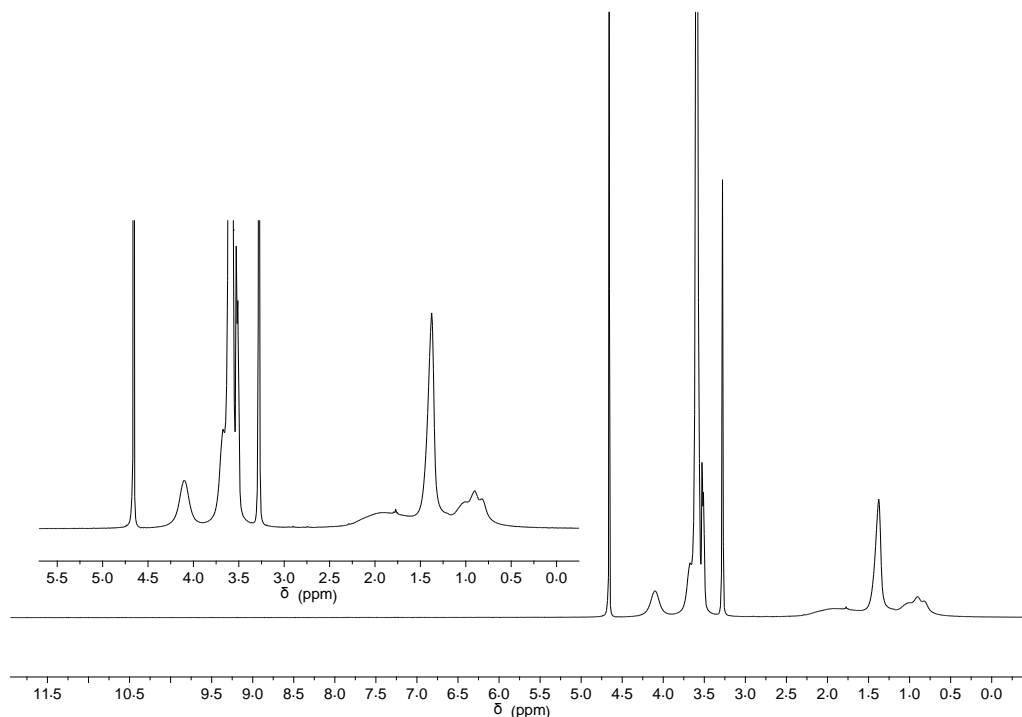

**Fig. S31**  $^1\text{H}$  NMR spectrum (300 MHz) of grafted PPEGMA<sub>475</sub>-*co*-PAA in DMSO-*d*<sub>6</sub>. The polymer was collected from Fe<sub>3</sub>O<sub>4</sub>@SiO<sub>2</sub>@PPEGMA<sub>475</sub>-*co*-PAA after treated with HF to remove the Fe<sub>3</sub>O<sub>4</sub>@SiO<sub>2</sub> core.

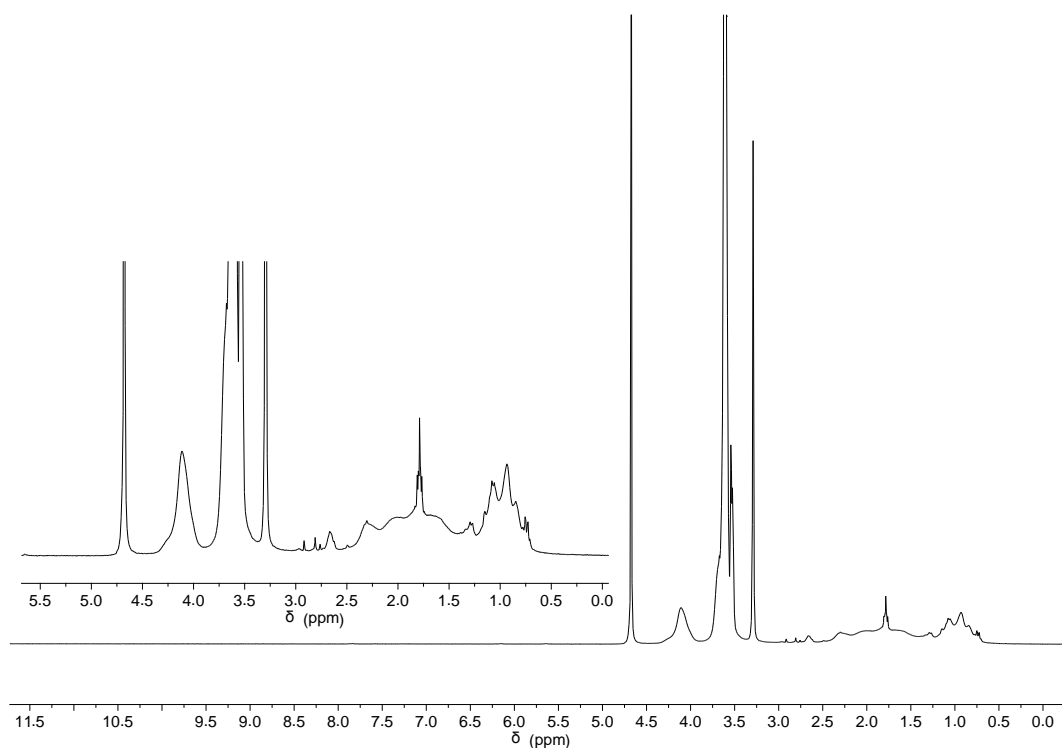

**Fig. S32**  $^1\text{H}$  NMR spectrum (300 MHz) of grafted PPEGMA<sub>475</sub>-*co*-PAA in DMSO-*d*<sub>6</sub>. The polymer was collected from Fe<sub>3</sub>O<sub>4</sub>@SiO<sub>2</sub>@PPEGMA<sub>475</sub>-*co*-PAA after treated with HF to remove the Fe<sub>3</sub>O<sub>4</sub>@SiO<sub>2</sub> core.

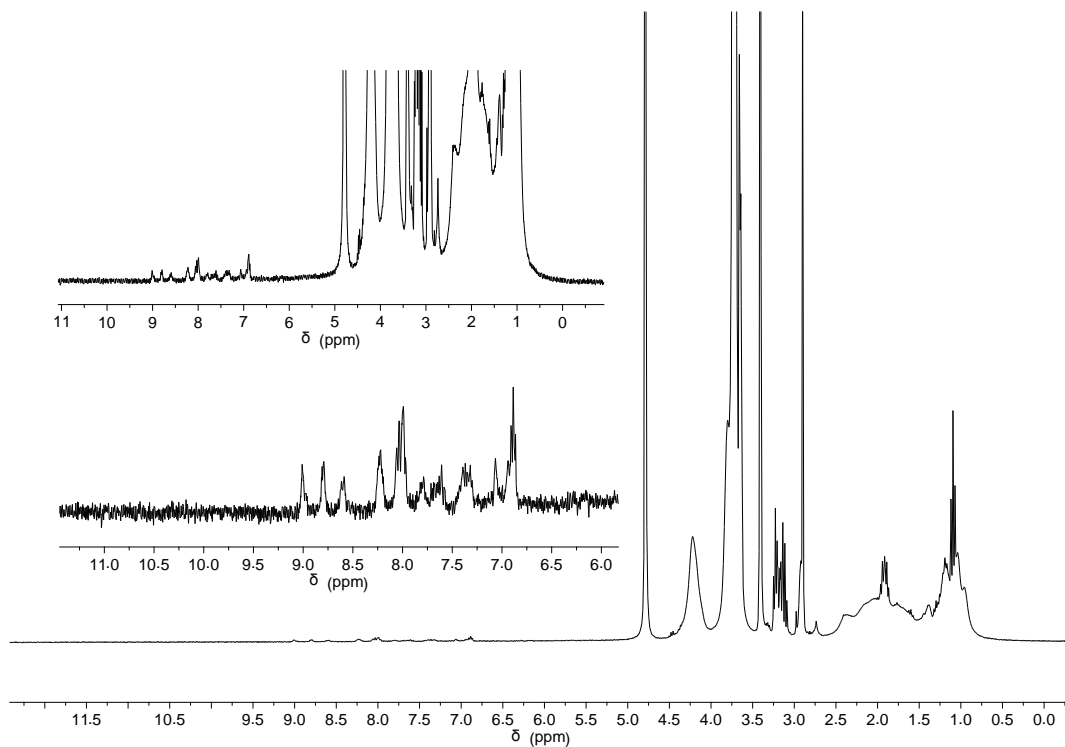

**Fig. S33**  $^1\text{H}$  NMR spectrum of grafted polymer in  $\text{DMSO-}d_6$ . The polymer was collected from  $\text{Fe}_3\text{O}_4@\text{SiO}_2@\text{PPEGMA}_{475}\text{-}co\text{-PAA}@$ Oxazine-2 after treated with HF to remove the  $\text{Fe}_3\text{O}_4@\text{SiO}_2$  core.

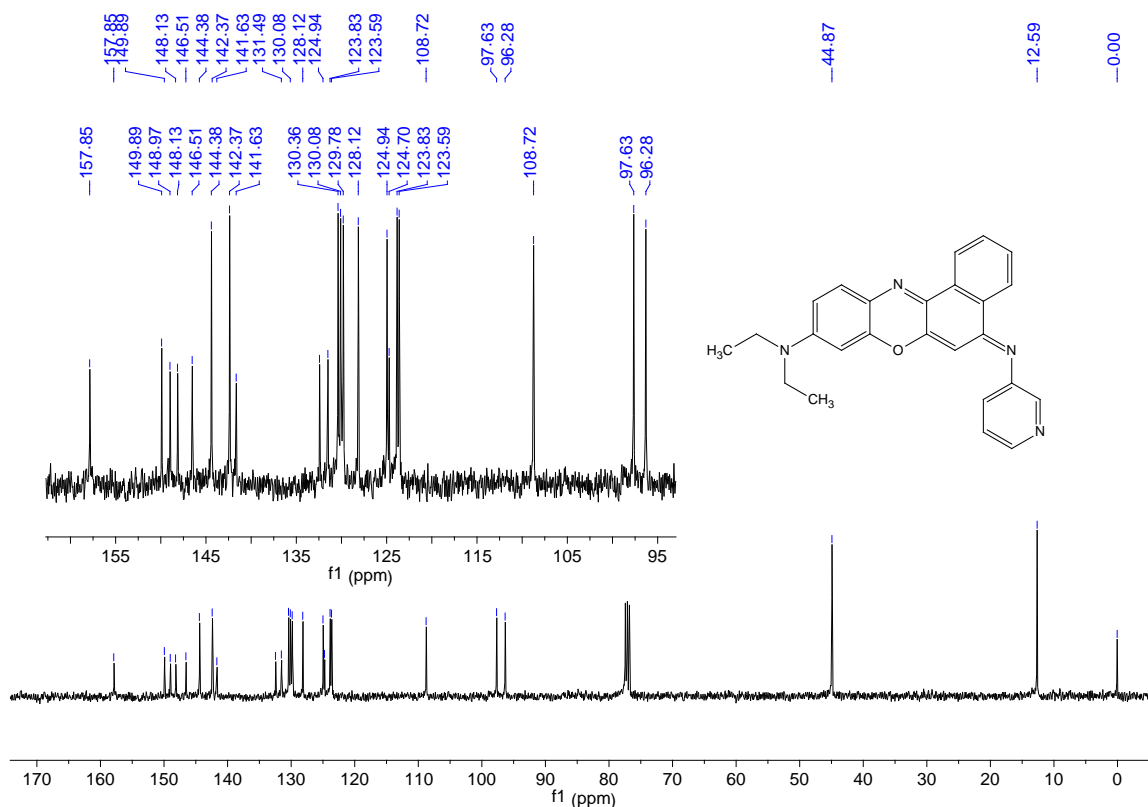

**Fig. S34**  $^{13}\text{C}$  NMR (75 MHz) of **2a** in  $\text{CDCl}_3$ .

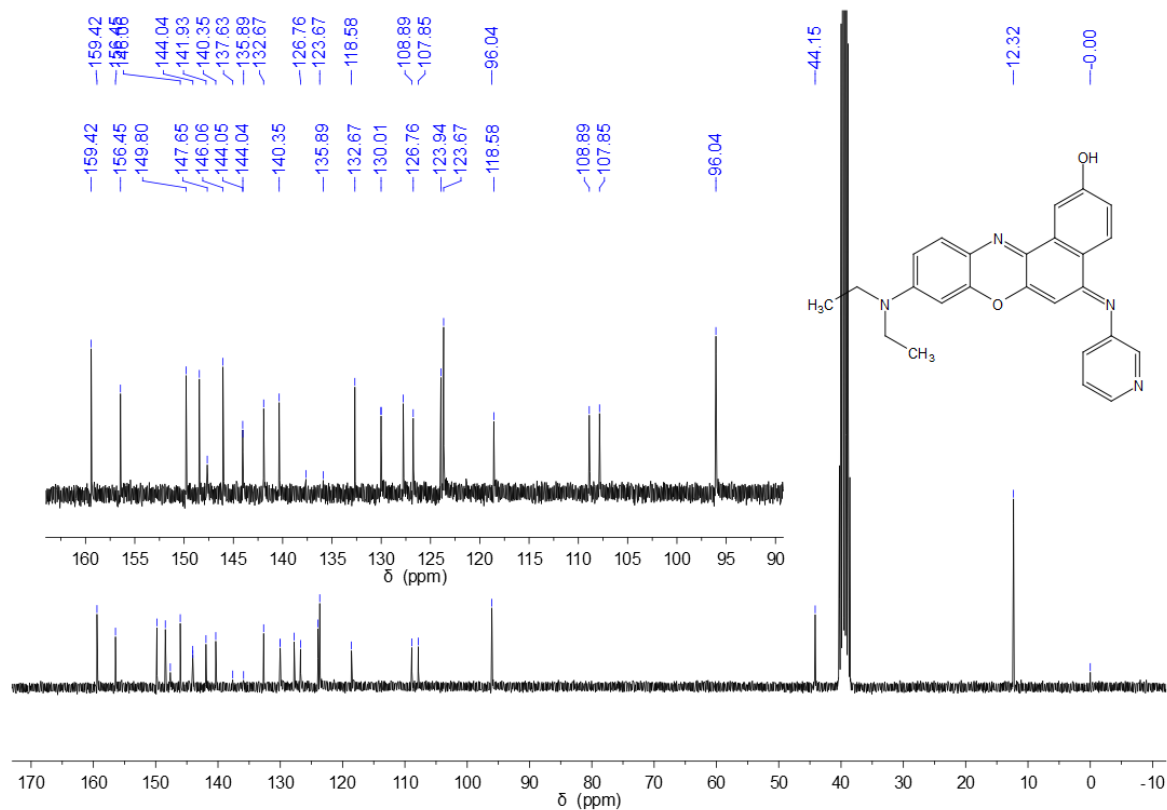

**Fig. S35**  $^{13}\text{C}$  NMR (75 MHz) of **2b** in  $\text{DMSO-}d_6$ .

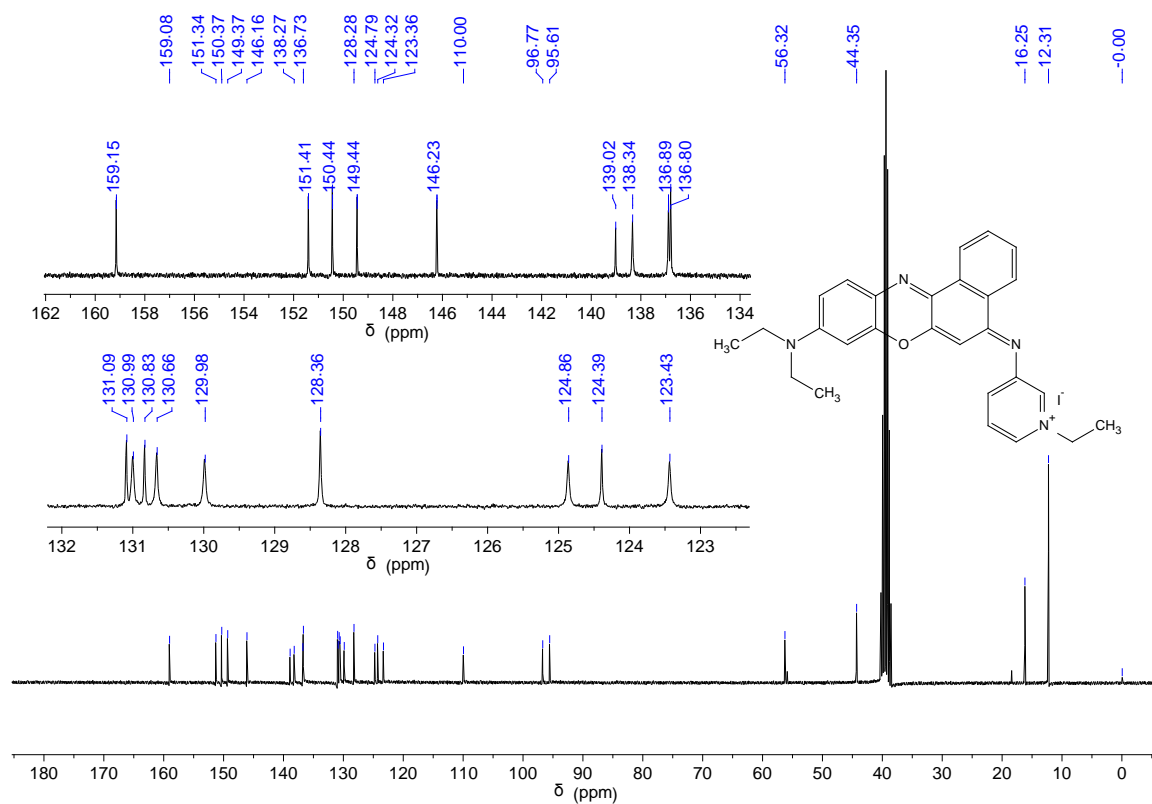

**Fig. S36**  $^{13}\text{C}$  NMR (75 MHz) of **3a** in  $\text{DMSO-}d_6$ .

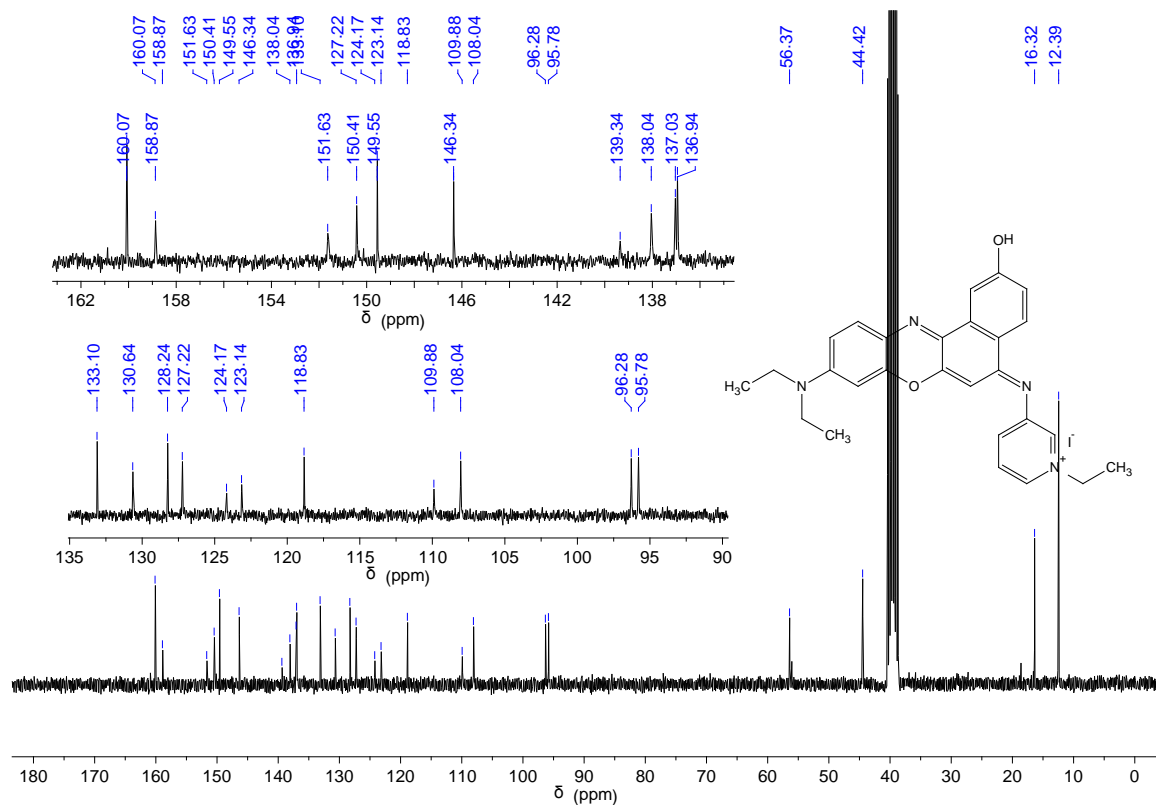

**Fig. S37** <sup>13</sup>C NMR (75 MHz) of **3b** in DMSO-*d*<sub>6</sub>.

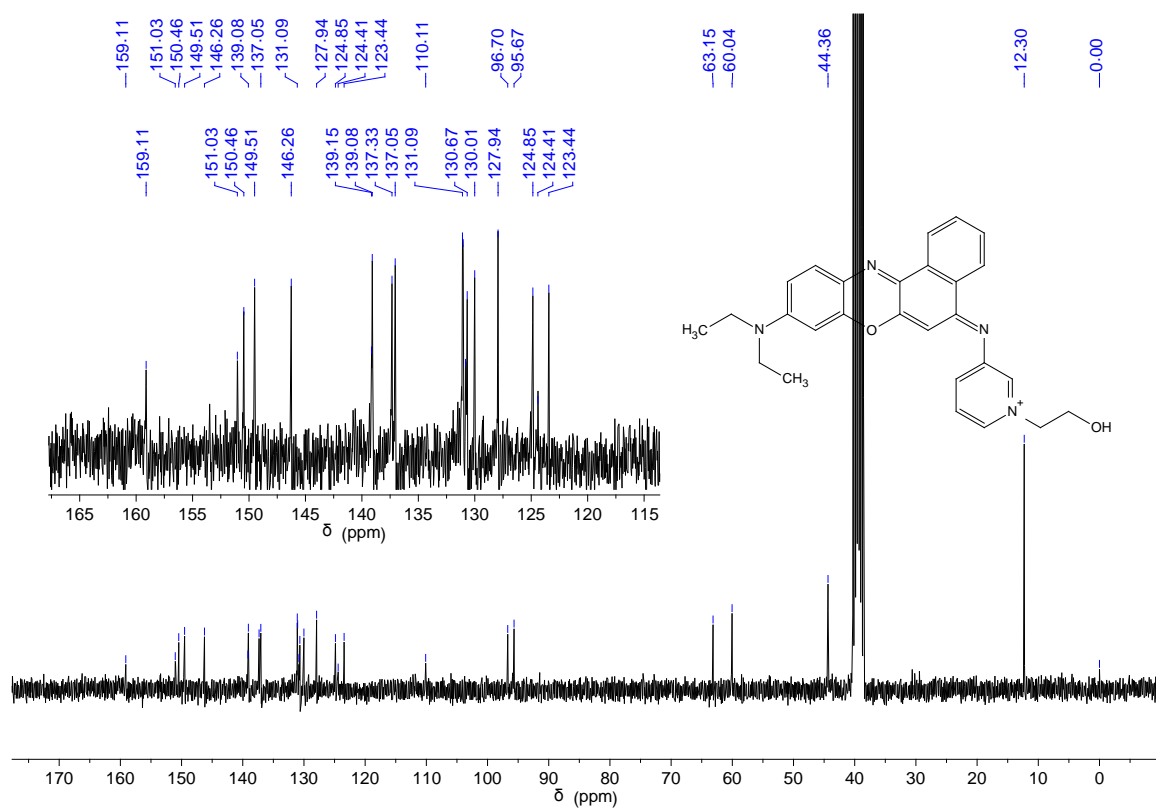

**Fig. S38** <sup>13</sup>C NMR (75 MHz) of **3c** in DMSO-*d*<sub>6</sub>.

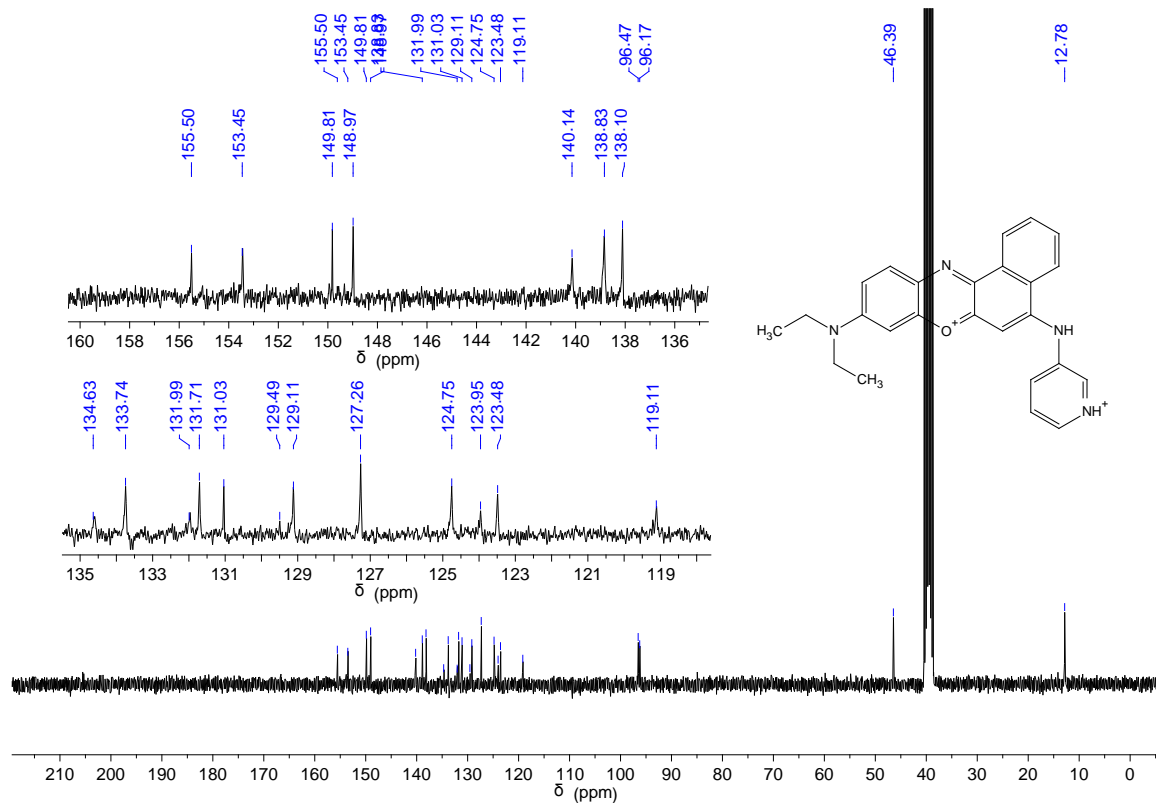

**Fig. S39** <sup>13</sup>C NMR (75 MHz) of **2a+H<sup>+</sup>** in DMSO-*d*<sub>6</sub>.

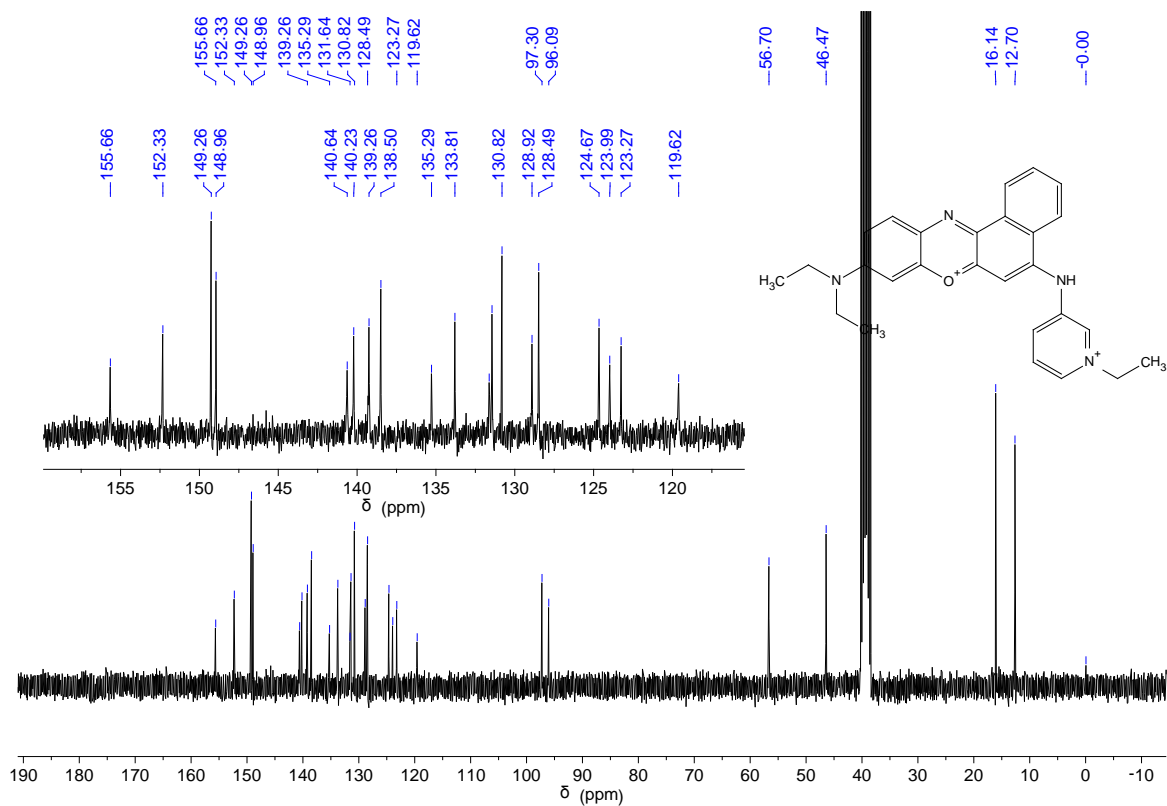

**Fig. S40** <sup>13</sup>C NMR (75 MHz) of **3a+H<sup>+</sup>** in DMSO-*d*<sub>6</sub>.

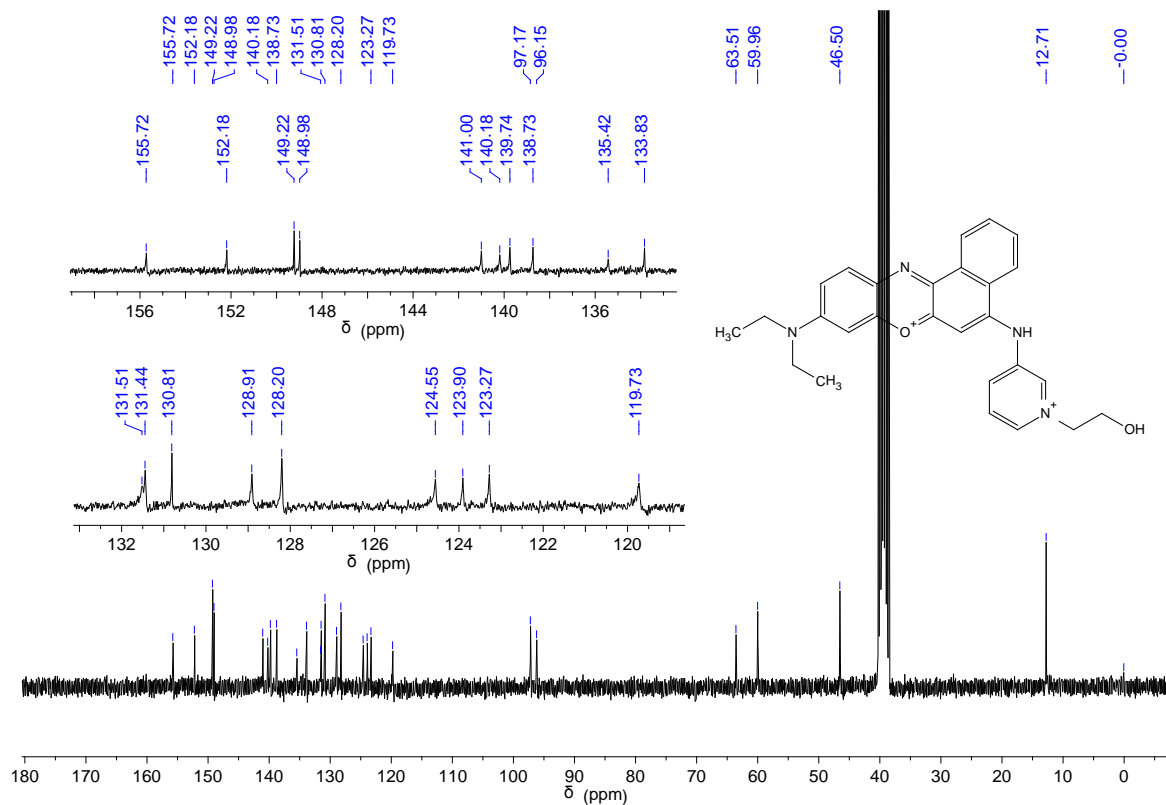

**Fig. S41** <sup>13</sup>C NMR (75 MHz) of **3c+H<sup>+</sup>** in DMSO-d<sub>6</sub>.

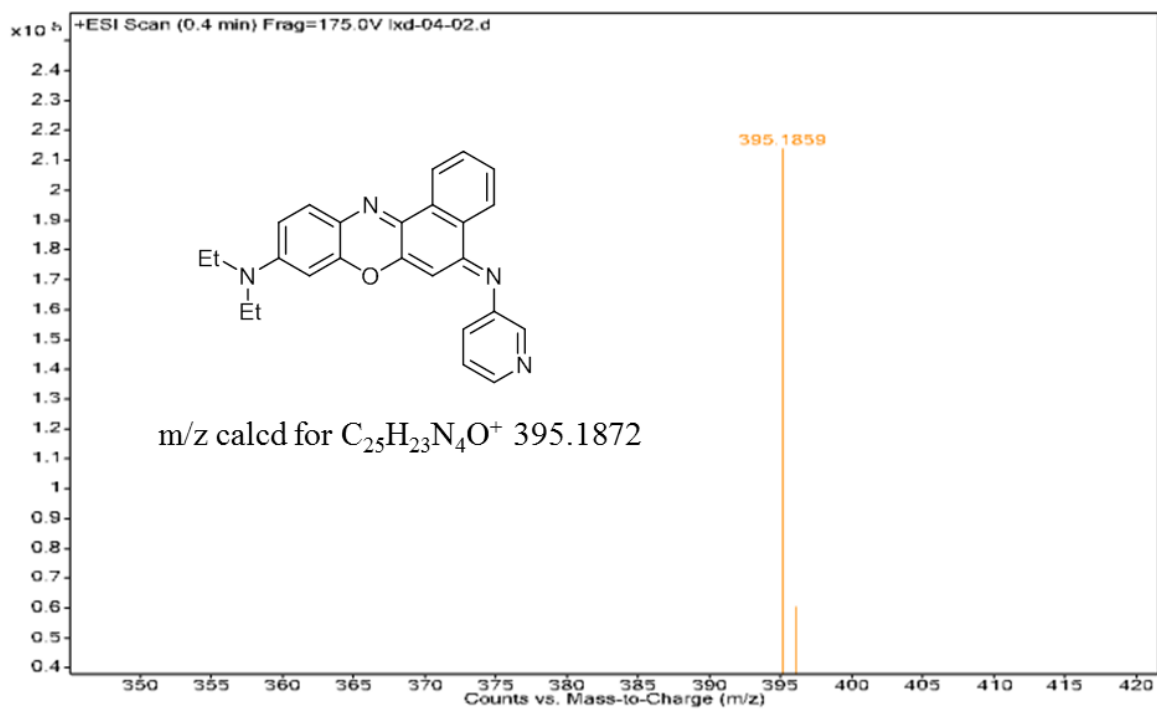

**Fig. S42** HRMS of **2a**.

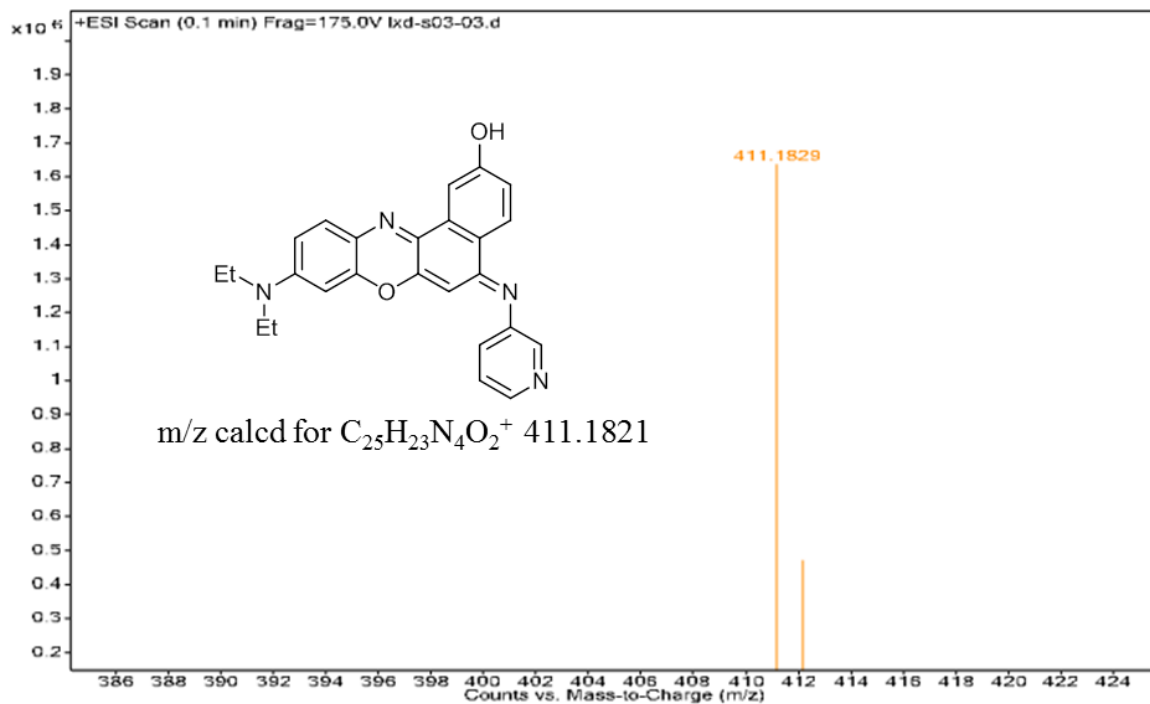

Fig. S43 HRMS of 2b.

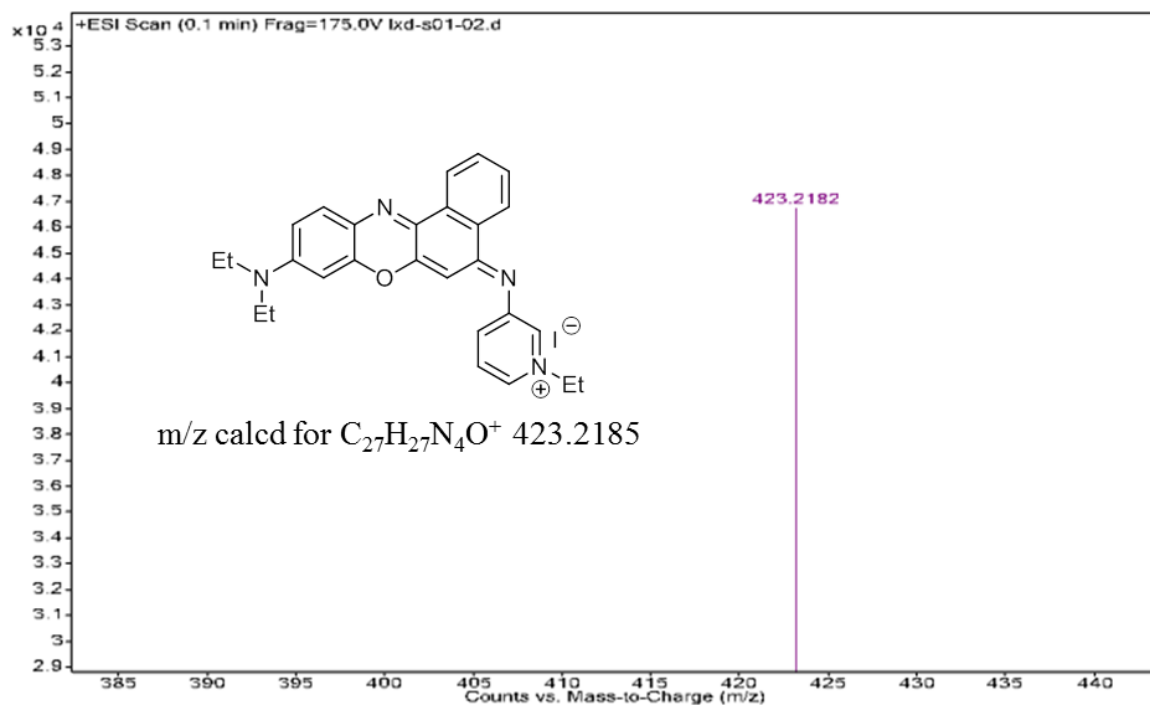

Fig. S44 HRMS of 3a.

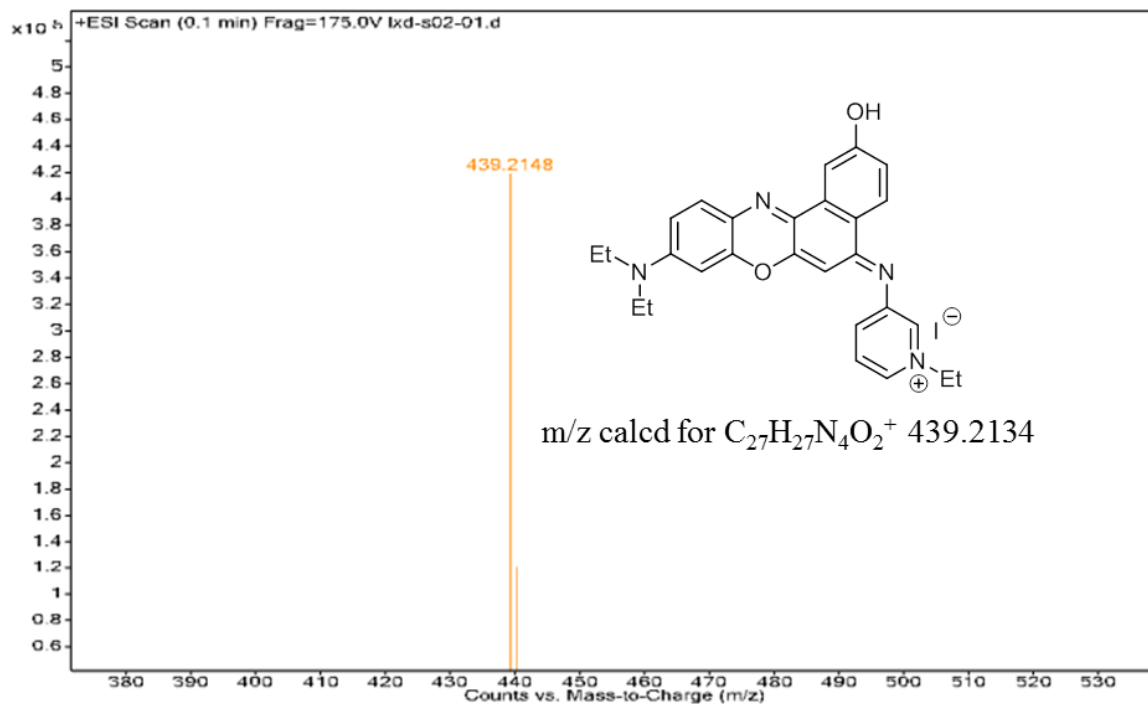

Fig. S45 HRMS of 3b.

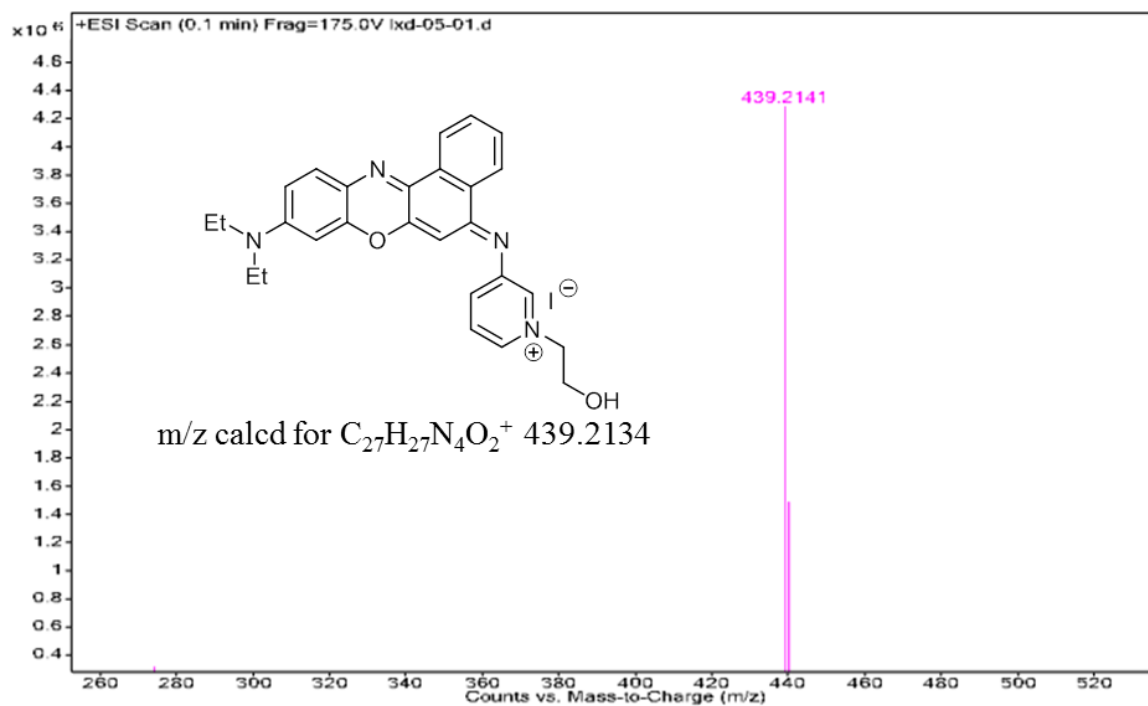

Fig. S46 HRMS of 3c.



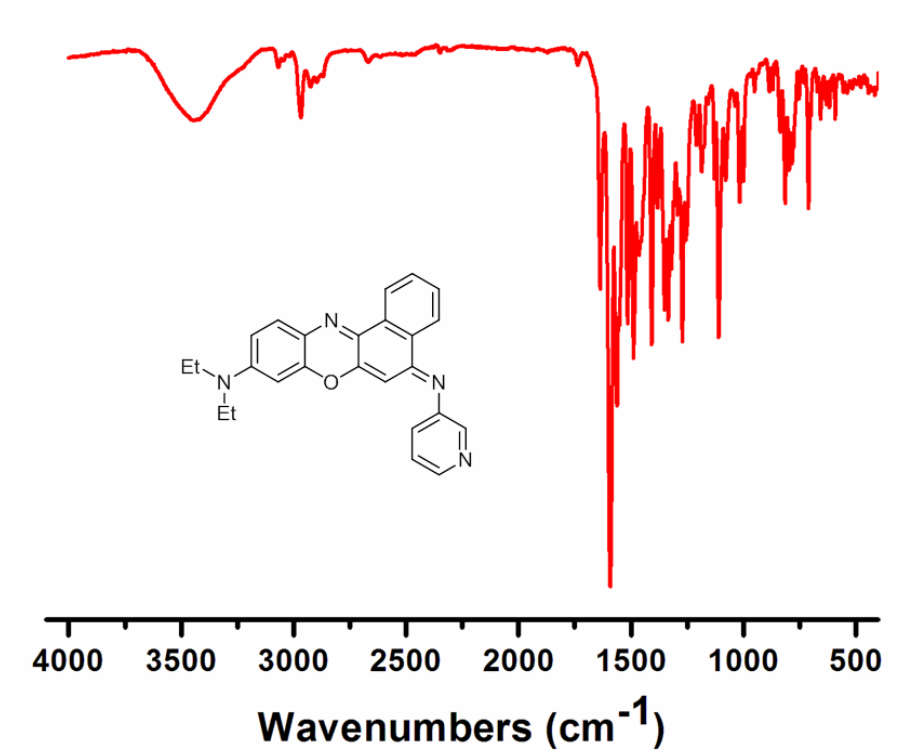

Fig. S47 FRTC of 2a.

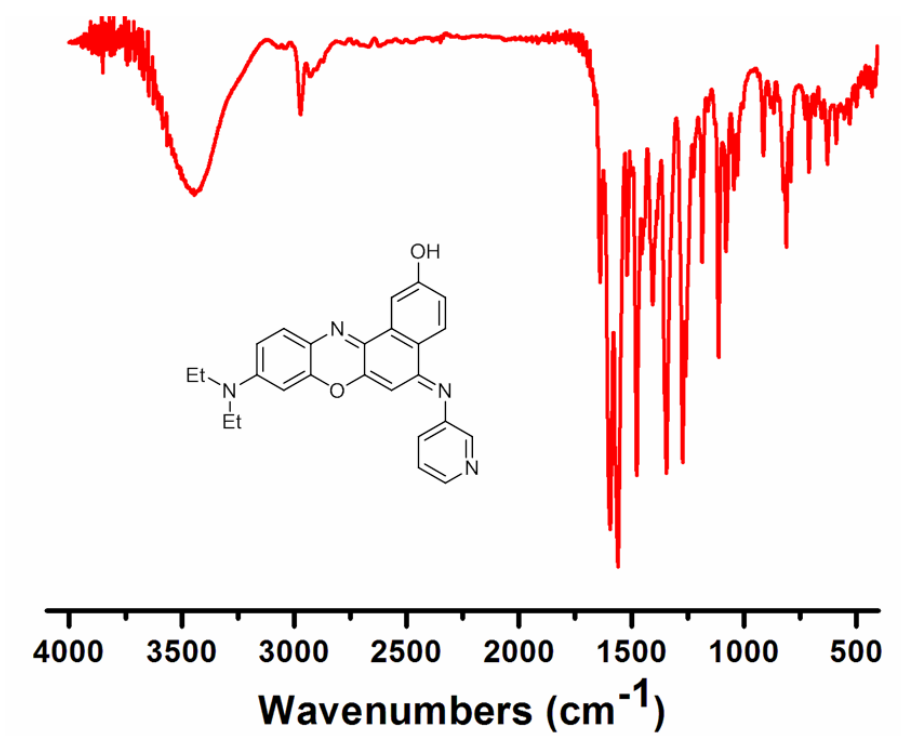

Fig. S48 FRTC of 2b.

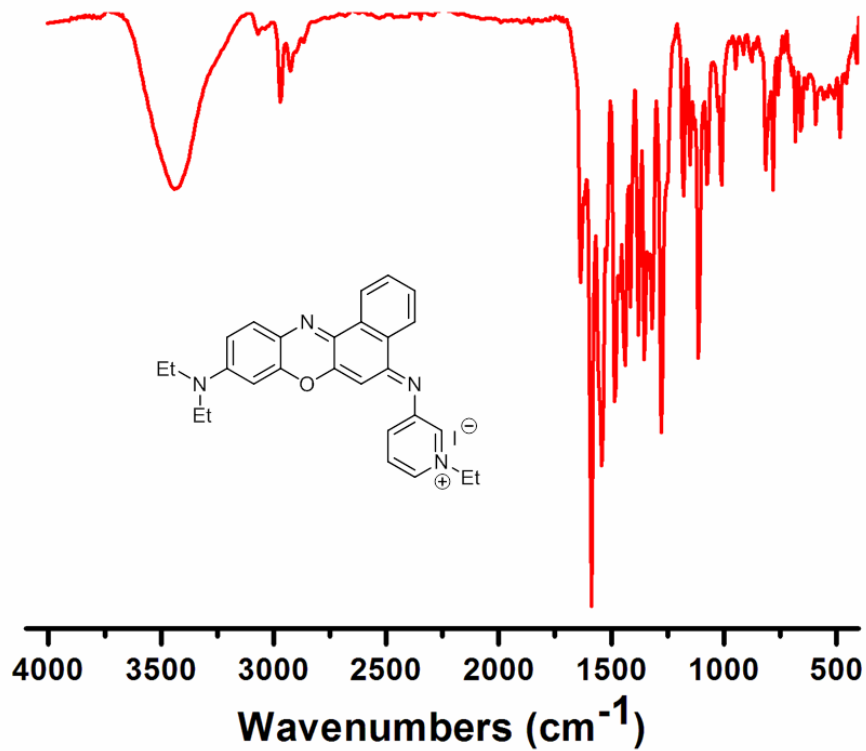

Fig. S49 FRTC of 3a.

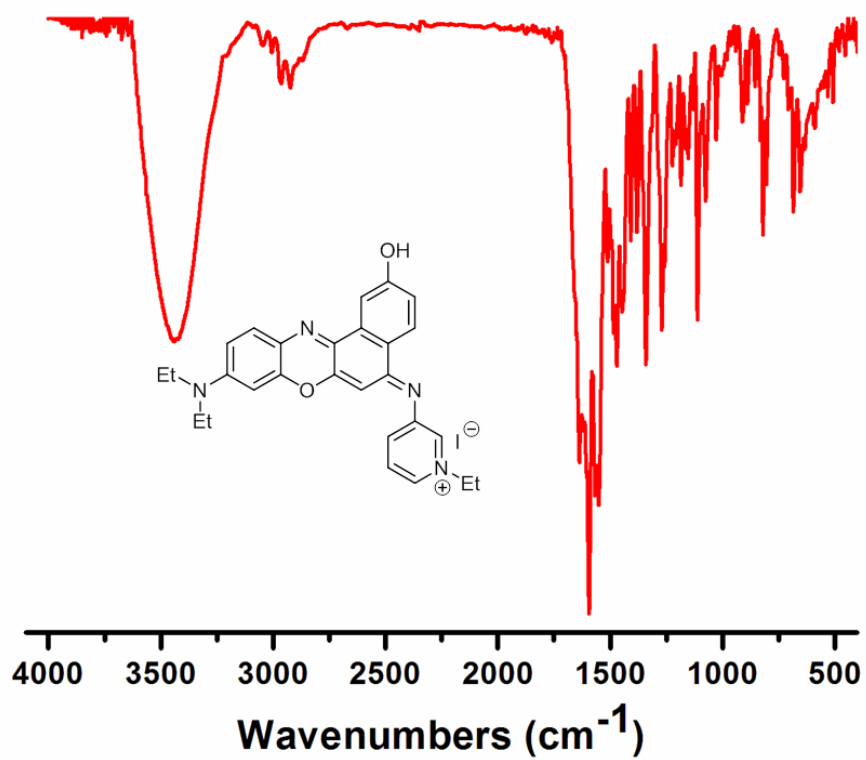

Fig. S50 FRTC of 3b.

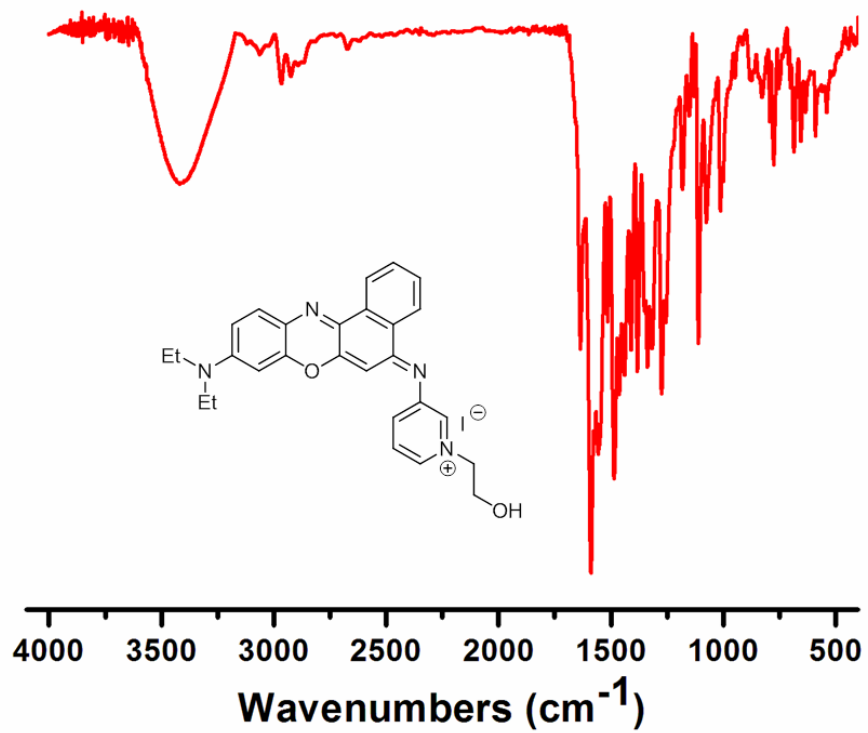

Fig. S51 FRTC of 3c.
